# Supplementary material for: Design and synthesis of inositolphosphoglycan putative insulin mediators
Source: Royal Society of Chemistry journal article supplement (doi:10.1039/b418041k), 2005-01-01

## Supporting Information

### Experimental

Synthesis and full characterisation of compounds **43-53**, **58**, **67**, **68**, **71-73**.

**tert-Butyldimethylsilyl 2-azido-4,6-O-benzylidene-2-deoxy-3-O-p-methoxybenzyl-β-D-glucopyranoside 43.** To a solution of **39**<sup>1,2</sup> (1.47 g, 3.61 mmol) and *p*-methoxybenzyl trichloroacetimidate<sup>3</sup> (6.12 g, 21.66 mmol) with 4Å molecular sieves in dry CH<sub>2</sub>Cl<sub>2</sub> (18 mL) Et<sub>2</sub>O·BF<sub>3</sub> (155 μl, 1.223 mmol) was added at 0°C and stirred for 18 h under an argon atmosphere. The mixture was neutralized with Et<sub>3</sub>N, concentrated in *vacuo* and the residue was purified by flash chromatography (hexane/AcOEt 29/1) to yield 1.33 g (70%) of **43** as a colourless syrup.  $[\alpha]_{\text{D}}^{20} = -85.3$  ( $c = 0.8$ , CHCl<sub>3</sub>). <sup>1</sup>H-RMN (CDCl<sub>3</sub>, 500 MHz): δ 7.49 (m, 2H, ArH benzylidene), 7.39 (m, 3H, ArH benzylidene), 7.31 (d,  $J = 8.5$  Hz, 2H, ArH PMB), 6.86 (d,  $J = 8.5$  Hz, 2H, ArH PMB), 5.57 (s, 1H, CH<sub>benzylic</sub> benzylidene), 4.83 (d,  $J = 11.0$  Hz, 1H, CH<sub>benzylic</sub> PMB), 4.73 (d,  $J = 11.0$  Hz, 1H, CH<sub>benzylic</sub> PMB), 4.58 (d,  $J_{1,2} = 8.0$  Hz, 1H, H<sub>1</sub>), 4.29 (dd,  $J_{6,5} = 5.0$  Hz,  $J_{6,6'} = 10.5$  Hz, 1H, H<sub>6</sub>), 3.80 (s, 3H, CH<sub>3</sub>O PMB), 3.79 (t,  $J_{6',6} = J_{6',5} = 10.5$  Hz, 1H, H<sub>6'</sub>), 3.70 (t,  $J_{4,3} = J_{4,5} = 9.5$  Hz, 1H, H<sub>4</sub>), 3.51 (t,  $J_{3,4} = J_{3,2} = 9.5$  Hz, 1H, H<sub>3</sub>), 3.38 (td,  $J_{5,6} = 5.0$  Hz,  $J_{5,6'} = J_{5,4} = 10.0$  Hz, 1H, H<sub>5</sub>), 3.35 (dd,  $J_{2,1} = 8.0$  Hz,  $J_{2,3} = 10.0$  Hz, 1H, H<sub>2</sub>), 0.94 (s, 9H, (CH<sub>3</sub>)<sub>3</sub>C TBDMS), 0.17 (s, 3H, CH<sub>3</sub> TBDMS), 0.16 (s, 3H, CH<sub>3</sub> TBDMS). <sup>13</sup>C-RMN (CDCl<sub>3</sub>, 125 MHz): δ 159.35 (ArC PMB), 137.24 (ArC benzylidene), 130.08 (ArC PMB), 129.81 (2 x ArCH PMB), 129.01 (ArCH benzylidene), 128.24 (2 x ArCH benzylidene), 126.02 (2 x ArCH benzylidene), 113.76 (2 x ArCH PMB), 101.32 (CH<sub>benzylic</sub> benzylidene), 97.48 (C<sub>1</sub>), 81.65 (C<sub>4</sub>), 78.42 (C<sub>3</sub>), 74.46 (CH<sub>2</sub> benzylic PMB), 68.74 (C<sub>2</sub>), 68.62 (C<sub>6</sub>), 66.35 (C<sub>5</sub>), 55.24 (CH<sub>3</sub>O PMB), 25.55 ((CH<sub>3</sub>)<sub>3</sub>C TBDMS), 17.94 ((CH<sub>3</sub>)<sub>3</sub>C TBDMS), -4.36, -5.19 (CH<sub>3</sub> TBDMS). FAB-MS:  $m/z$  550 (M + Na)<sup>+</sup>. Anal. calcd. for C<sub>27</sub>H<sub>37</sub>O<sub>6</sub>SiN<sub>3</sub> C 61.46%; H 7.07%; N 7.96%; found C 61.42%; H 7.00%; N 8.11%.

**2-Azido-4,6-O-benzylidene-2-deoxy-3-O-p-methoxybenzyl-α,β-D-glucopyranose 44.** A solution of **43** (1.33 g, 2.52 mmol) in dry THF (12 mL) under an argon atmosphere was cooled at -40°C and glacial AcOH (216 μl, 3.778 mmol) first and TBAF (1.0 M solution in THF, 3.0 mL) then were added. After 2 h the mixture was diluted with Et<sub>2</sub>O (50 mL) and washed with sat. NaCl solution (50 mL). The aqueous layer was extracted with Et<sub>2</sub>O (2 x 25 mL) and the combined organic layers were dried over MgSO<sub>4</sub> and concentrated in *vacuo*. The residue was purified by flash chromatography (hexane/AcOEt 4/1) to yield and α/β anomeric mixture of **44**

(1.02 g, 98%) as a colourless syrup. *Data for a  $\alpha/\beta = 1/1$  mixture:*  $^1\text{H-RMN}$  ( $\text{CDCl}_3$ , 500 MHz):  $\delta$  7.50 (m, 4H, ArH benzyldiene), 7.40 (m, 6H, ArH benzyldiene), 7.31 (d,  $J = 9.0$  Hz, 2H, ArH PMB), 7.30 (d,  $J = 9.0$  Hz, 2H, ArH PMB), 6.863 (d,  $J = 9.0$  Hz, 2H, ArH PMB), 6.860 (d,  $J = 9.0$  Hz, 2H, ArH PMB), 5.60 (s, 1H,  $\text{CH}_{\text{benzylic}}$  benzyldiene), 5.87 (s, 1H,  $\text{CH}_{\text{benzylic}}$  benzyldiene), 5.29 (t,  $J_{1,\text{OH}} = J_{1,2} = 3.5$  Hz, 1H,  $\text{H}_{1\alpha}$ ), 4.89 (d,  $J = 10.5$  Hz, 1H,  $\text{CH}_{\text{benzylic}}$  PMB), 4.86 (d,  $J = 11.0$  Hz, 1H,  $\text{CH}_{\text{benzylic}}$  PMB), 4.75 (d,  $J = 10.5$  Hz, 1H,  $\text{CH}_{\text{benzylic}}$  PMB), 4.74 (d,  $J = 10.5$  Hz, 1H,  $\text{CH}_{\text{benzylic}}$  PMB), 4.67 (dd,  $J_{1,\text{OH}} = 5.5$  Hz,  $J_{1,2} = 8.0$  Hz, 1H,  $\text{H}_{1\beta}$ ), 4.34 (dd,  $J_{6,5} = 5.0$  Hz,  $J_{6,6'} = 10.5$  Hz, 1H,  $\text{H}_{6\beta}$ ), 4.28 (dd,  $J_{6,5} = 5.0$  Hz,  $J_{6,6'} = 10.0$  Hz, 1H,  $\text{H}_{6\alpha}$ ), 4.12 (td,  $J_{5,6} = 5.0$  Hz,  $J_{5,6'} = J_{5,4} = 10.0$  Hz, 1H,  $\text{H}_{5\alpha}$ ), 4.08 (t,  $J_{3,2} = J_{3,4} = 9.5$  Hz, 1H,  $\text{H}_{3\alpha}$ ), 3.799 (s, 3H,  $\text{CH}_3\text{O}$  PMB), 3.797 (t,  $J_{6',6} = J_{6',5} = 10.5$  Hz, 1H,  $\text{H}_{6\beta'}$ ), 3.795 (s, 3H,  $\text{CH}_3\text{O}$  PMB), 3.75 (t,  $J_{6',6} = J_{6',5} = 10.0$  Hz, 1H,  $\text{H}_{6\alpha'}$ ), 3.72 (t,  $J_{4,3} = J_{4,5} = 9.5$  Hz, 1H,  $\text{H}_{4\beta}$ ), 3.71 (t,  $J_{4,3} = J_{4,5} = 9.5$  Hz, 1H,  $\text{H}_{4\alpha}$ ), 3.61 (t,  $J_{3,2} = J_{3,4} = 9.5$  Hz, 1H,  $\text{H}_{3\beta}$ ), 3.48 (dd,  $J_{2,1} = 3.5$  Hz,  $J_{2,3} = 9.5$  Hz, 1H,  $\text{H}_{2\alpha}$ ), 3.45 (td,  $J_{5,6} = 5.0$  Hz,  $J_{5,6'} = J_{5,4} = 9.5$  Hz, 1H,  $\text{H}_{5\beta}$ ), 3.39 (dd,  $J_{2,1} = 8.0$  Hz,  $J_{2,3} = 9.5$  Hz, 1H,  $\text{H}_{2\beta}$ ), 3.21 (d,  $J_{\text{OH},1} = 5.5$  Hz, 1H,  $\text{OH}_{\beta}$ ), 2.78 (d,  $J_{\text{OH},1} = 3.5$  Hz, 1H,  $\text{OH}_{\alpha}$ ).  $^{13}\text{C-RMN}$  ( $\text{CDCl}_3$ , 125 MHz):  $\delta$  159.39 (2 x ArC PMB), 137.16, 137.02 (2 x ArC benzyldiene), 129.99, 129.94 (2 x 2 x ArCH PMB), 129.84, 129.77 (2 x ArC PMB), 129.07, 129.05 (2 x ArCH benzyldiene), 128.27 (2 x 2 x ArCH benzyldiene), 125.99, 125.94 (2 x 2 x ArCH benzyldiene), 113.85, 113.80 (2 x 2 x ArCH PMB), 101.43, 101.30 (2 x  $\text{CH}_{\text{benzylic}}$  benzyldiene), 96.43 ( $\text{C}_{1\beta}$ ), 92.63 ( $\text{C}_{1\alpha}$ ), 82.67 ( $\text{C}_{4\alpha}$ ), 81.48 ( $\text{C}_{4\beta}$ ), 78.60 ( $\text{C}_{3\beta}$ ), 75.77 ( $\text{C}_{3\alpha}$ ), 74.70, 74.56 ( $\text{CH}_2$  benzylic PMB), 68.87 ( $\text{C}_{6\alpha}$ ), 68.43 ( $\text{C}_{6\beta}$ ), 67.21 ( $\text{C}_{2\beta}$ ), 66.37 ( $\text{C}_{5\beta}$ ), 63.50 ( $\text{C}_{2\alpha}$ ), 62.72 ( $\text{C}_{5\alpha}$ ), 55.23 (2 x  $\text{CH}_3\text{O}$  PMB). FAB-MS:  $m/z$  436 ( $\text{M} + \text{Na}$ ) $^+$ . Anal. calcd. for  $\text{C}_{21}\text{H}_{23}\text{O}_6\text{N}_3$ : C 61.01%; H 5.61%; N 10.16%; found C 60.78%; H 5.76%; N 10.28%.

**2-Azido-4,6-benzyldiene-2-deoxy-3-O-p-methoxybenzyl- $\alpha,\beta$ -D-glucopyranosyl trichloroacetimidate 45.** To a solution of **44** (1.02 g, 2.47 mmol) in dry  $\text{CH}_2\text{Cl}_2$  (12 mL), trichloroacetonitrile (3.7 mL, 36.9 mmol) and DBU (19  $\mu\text{l}$ , 0.127 mmol) were added. The solution was stirred for 2 h under an argon atmosphere and concentrated in *vacuo*. The residue was purified by flash chromatography (hexane/AcOEt/Et<sub>3</sub>N 4/0.9/0.1) to yield and  $\alpha/\beta$  anomeric mixture of **45** (1.31 g, 95%) as a white foam. *RMN data for  $\alpha$ -anomer extracted from an  $\alpha/\beta = 2/1$  mixture:*  $^1\text{H-RMN}$  ( $\text{CDCl}_3$ , 500 MHz):  $\delta$  8.74 (s, 1H,  $\text{OCNHCCl}_3$ ), 7.52 (m, 2H, ArH benzyldiene), 7.40 (m, 3H, ArH benzyldiene), 7.33 (d,  $J = 8.5$  Hz, 2H, ArH PMB), 6.88 (d,  $J = 8.5$  Hz, 2H, ArH PMB), 6.37 (d,  $J_{1,2} = 3.5$  Hz, 1H,  $\text{H}_1$ ), 5.62 (s, 1H,  $\text{CH}_{\text{benzylic}}$  benzyldiene), 4.96 (d,  $J = 10.5$  Hz, 1H,  $\text{CH}_{\text{benzylic}}$  PMB), 4.78 (d,  $J = 10.5$  Hz, 1H,  $\text{CH}_{\text{benzylic}}$  PMB), 4.34 (dd,  $J_{6,5} = 5.0$  Hz,  $J_{6,6'} = 10.5$  Hz, 1H,  $\text{H}_6$ ), 4.16 (t,  $J_{3,4} = J_{3,2} = 9.5$  Hz, 1H,  $\text{H}_3$ ), 4.06 (td,  $J_{5,6} = 5.0$  Hz,  $J_{5,6'}$

=  $J_{5,4} = 10.0$  Hz, 1H, H<sub>5</sub>), 3.82 (t,  $J_{4,3} = J_{4,5} = 9.5$  Hz, 1H, H<sub>4</sub>), 3.80 (s, 3H, CH<sub>3</sub>O PMB), 3.78 (t,  $J_{6',5} = J_{6',6} = 10.5$  Hz, 1H, H<sub>6'</sub>), 3.70 (dd,  $J_{2,1} = 3.5$  Hz,  $J_{2,3} = 10.0$  Hz, 1H, H<sub>2</sub>). <sup>13</sup>C-RMN (CDCl<sub>3</sub>, 125 MHz):  $\delta$  160.85 (OCNHCCl<sub>3</sub>), 159.52 (ArC PMB), 136.91 (ArC benzylidene), 129.98 (2 x ArCH PMB), 129.71 (ArC PMB), 129.14 (ArCH benzylidene), 128.34 (2 x ArCH benzylidene), 125.93 (2 x ArCH benzylidene), 113.88 (2 x ArCH PMB), 101.45 (CH<sub>benzylic</sub> benzylidene), 94.87 (C<sub>1</sub>), 90.72 (OCNHCCl<sub>3</sub>), 82.23 (C<sub>4</sub>), 75.93 (C<sub>3</sub>), 74.89 (CH<sub>2</sub> benzylic PMB), 68.56 (C<sub>6</sub>), 65.24 (C<sub>5</sub>), 62.44 (C<sub>2</sub>), 55.28 (CH<sub>3</sub>O PMB). HRMS  $m/z$  calcd. for C<sub>23</sub>H<sub>23</sub>O<sub>6</sub>N<sub>4</sub>Cl<sub>3</sub>Na<sup>+</sup>: 579.0577; found 579.0581 (M + Na)<sup>+</sup>, 581.0551 (M + Na + 2)<sup>+</sup>, 583.0506 (M + Na + 4)<sup>+</sup>.

**2-Azido-3-O-benzyl-4,6-O-benzylidene-2-deoxy- $\alpha$ -D-glucopyranosyl-(1 $\rightarrow$ 6)-3,4-O-(1,1,3,3-tetraisopropylidisiloxane-1,3-di-yl)-1,2-O-(L-1,7,7-trimethyl-[2,2,1]-bicyclohept-2-ylidene)-D-*myo*-inositol 46.**<sup>4</sup> To a solution of **42**<sup>5,6</sup> (1.30 g, 2.46 mmol) and **37**<sup>7</sup> (1.15 g, 2.07 mmol) in dry Et<sub>2</sub>O (38 mL) with 4Å molecular sieves under an argon atmosphere, TMSOTf (23  $\mu$ l, 0.106 mmol) at -40°C was added. The solution was stirred for 2 h, neutralised with Et<sub>3</sub>N and concentrated in *vacuo*. The residue was purified by flash chromatography (hexane/AcOEt 24/1, 14/1, 9/1, 4/1, 2/1, 1/1) to yield 1.37 g (72%) of  $\alpha$ -(1 $\rightarrow$ 6) isomer **46**, 76 mg (4%) of  $\beta$ -(1 $\rightarrow$ 6) isomer **48** and 114 mg (6%) of  $\alpha$ -(1 $\rightarrow$ 5) isomer **50** as white foams. Data for **46**: TLC (hexane/AcOEt 4/1)  $R_f = 0.47$ ;  $[\alpha]_D^{20} = +37.0$  ( $c = 1.2$ , CHCl<sub>3</sub>). <sup>1</sup>H-RMN (CDCl<sub>3</sub>, 500 MHz):  $\delta$  7.51 (m, 2H, ArH), 7.41-7.26 (m, 8H, ArH), 5.58 (s, 1H, CH<sub>benzylic</sub> benzylidene), 5.41 (d,  $J_{1,2} = 4.0$  Hz, 1H, H<sub>1b</sub>), 4.98 (d,  $J = 11.0$  Hz, 1H, CH<sub>benzylic</sub>), 4.81 (d,  $J = 11.0$  Hz, 1H, CH<sub>benzylic</sub>), 4.41 (td,  $J_{5,6} = 5.0$  Hz,  $J_{5,4} = J_{5,6'} = 10.0$  Hz, 1H, H<sub>5b</sub>), 4.28 (dd,  $J_{6,5} = 5.0$  Hz,  $J_{6,6'} = 10.0$  Hz, 1H, H<sub>6b</sub>), 4.21 (dd,  $J_{2,3} = 4.0$  Hz,  $J_{2,1} = 5.5$  Hz, 1H, H<sub>2a</sub>), 4.12 (t,  $J_{3,2} = J_{3,4} = 9.5$  Hz, 1H, H<sub>3b</sub>), 4.05 (dd,  $J_{1,2} = 5.5$  Hz,  $J_{1,6} = 6.5$  Hz, 1H, H<sub>1a</sub>), 3.93 (dd,  $J_{3,2} = 4.0$  Hz,  $J_{3,4} = 9.5$  Hz, 1H, H<sub>3a</sub>), 3.86 (t,  $J_{4,3} = J_{4,5} = 9.0$  Hz, 1H, H<sub>4a</sub>), 3.75 (dd,  $J_{6,1} = 6.5$  Hz,  $J_{6,5} = 10.5$  Hz, 1H, H<sub>6a</sub>), 3.73 (t,  $J_{6',5} = J_{6',6} = 10.0$  Hz, 1H, H<sub>6b'</sub>), 3.71 (t,  $J_{4,3} = J_{4,5} = 9.5$  Hz, 1H, H<sub>4b</sub>), 3.42 (ddd,  $J_{5,OH} = 1.0$  Hz,  $J_{5,4} = 9.0$  Hz,  $J_{5,6} = 10.0$  Hz, 1H, H<sub>5a</sub>), 3.40 (dd,  $J_{2,1} = 3.5$  Hz,  $J_{2,3} = 10.0$  Hz, 1H, H<sub>2b</sub>), 2.56 (d,  $J_{OH,5} = 1.0$  Hz, 1H, OH), 1.96 (m, 1H, L-camphor), 1.88 (m, 1H, L-camphor), 1.71 (m, 2H, L-camphor), 1.50 (d,  $J = 13.0$  Hz, 1H, L-camphor), 1.39 (m, 1H, L-camphor), 1.24 (m, 1H, L-camphor), 1.13-0.95 (m, 31H, L-camphor + TIPDS), 0.85 (s, 3H, CH<sub>3</sub> L-camphor), 0.84 (s, 3H, CH<sub>3</sub> L-camphor). <sup>13</sup>C-RMN (CDCl<sub>3</sub>, 125 MHz):  $\delta$  138.00, 137.40 (ArC), 128.82, 128.33, 128.14, 127.74, 125.98 (ArCH), 117.70 (C<sub>acetalic</sub> L-camphor), 101.22 (CH<sub>benzylic</sub> benzylidene), 96.95 (C<sub>1b</sub>), 82.78 (C<sub>4b</sub>), 80.04 (C<sub>6a</sub>), 76.95 (C<sub>2a</sub>), 76.27 (C<sub>3b</sub>), 76.13 (C<sub>1a</sub>), 75.73 (C<sub>4a</sub>), 74.98 (CH<sub>2</sub> benzylic), 72.69 (C<sub>3a</sub>), 72.12 (C<sub>5a</sub>), 68.93 (C<sub>6b</sub>), 63.10 (C<sub>2b</sub>), 62.27 (C<sub>5b</sub>), 51.46, 47.95, 45.18, 45.10, 29.50, 27.00, 20.43, 20.12, 17.50, 17.36, 17.32, 17.26, 17.17, 17.07, 16.98, 12.88, 12.68, 12.17, 11.96, 9.76 (C, CH

*L-camphor* + *TIPDS*). FAB-MS:  $m/z$  922  $M^+$ , 944 ( $M + Na$ ) $^+$ . Anal. calcd. for  $C_{48}H_{71}O_{11}N_3Si_2$ : C 62.51%; H 7.76%; N 4.56%; found C 62.24%; H 7.81%; N 4.44%.

Data for **48**: TLC (hexane/AcOEt 4/1)  $R_f$  = 0.41;  $[\alpha]_{D}^{20}$  = - 39.0 ( $c$  = 0.7,  $CHCl_3$ ).  $^1H$ -RMN ( $CDCl_3$ , 500 MHz):  $\delta$  7.46 (m, 2H, ArH), 7.41-7.35 (m, 5H, ArH), 7.34-7.26 (m, 3H, ArH), 5.56 (s, 1H,  $CH_{benzylic}$  *benzylidene*), 4.89 (d,  $J$  = 11.0 Hz, 1H,  $CH_{benzylic}$ ), 4.792 (br d,  $J_{1,2}$  = 6.5 Hz, 1H, H<sub>1b</sub>), 4.787 (d,  $J$  = 11.0 Hz, 1H,  $CH_{benzylic}$ ), 4.32 (dd,  $J_{6,5}$  = 5.0 Hz,  $J_{6,6'}$  = 10.5 Hz, 1H, H<sub>6b</sub>), 4.22 (t,  $J_{2,1}$  =  $J_{2,3}$  = 4.5 Hz, 1H, H<sub>2a</sub>), 3.93 (dd,  $J_{3,2}$  = 4.5 Hz,  $J_{3,4}$  = 9.5 Hz, 1H, H<sub>3a</sub>), 3.92 (dd,  $J_{1,2}$  = 5.0 Hz,  $J_{1,6}$  = 7.0 Hz, 1H, H<sub>1a</sub>), 3.85 (t,  $J_{6',5}$  =  $J_{6',6}$  = 10.0 Hz, 1H, H<sub>6b'</sub>), 3.84 (t,  $J_{4,3}$  =  $J_{4,5}$  = 9.5 Hz, 1H, H<sub>4a</sub>), 3.75 (br t,  $J_{4,3}$  =  $J_{4,5}$  = 9.5 Hz, 1H, H<sub>4b</sub>), 3.68 (dd,  $J_{6,1}$  = 7.0 Hz,  $J_{6,5}$  = 10.5 Hz, 1H, H<sub>6a</sub>), 3.58 (m, 2H, H<sub>2b</sub> + H<sub>3b</sub>), 3.52 (td,  $J_{5,OH}$  = 1.0 Hz,  $J_{5,4}$  =  $J_{5,6}$  = 10.0 Hz, 1H, H<sub>5a</sub>), 3.43 (td,  $J_{5,6}$  = 5.0 Hz,  $J_{5,4}$  =  $J_{5,6'}$  = 10.0 Hz, 1H, H<sub>5b</sub>), 2.79 (d,  $J_{OH,5}$  = 1.0 Hz, 1H, OH), 1.98 (m, 2H, *L-camphor*), 1.71 (m, 2H, *L-camphor*), 1.53 (d,  $J$  = 13.0 Hz, 1H, *L-camphor*), 1.37 (m, 1H, *L-camphor*), 1.28 (m, 1H, *L-camphor*), 1.14-0.96 (m, 31H, *L-camphor* + *TIPDS*), 0.86 (s, 3H,  $CH_3$  *L-camphor*), 0.84 (s, 3H,  $CH_3$  *L-camphor*).  $^{13}C$ -RMN ( $CDCl_3$ , 125 MHz):  $\delta$  137.87, 137.22 (ArC), 128.96, 128.32, 128.22, 127.80, 125.95 (ArCH), 117.63 ( $C_{acetalic}$  *L-camphor*), 102.97 (C<sub>1b</sub>), 101.23 ( $CH_{benzylic}$  *benzylidene*), 83.43 (C<sub>6a</sub>), 81.42 (C<sub>4b</sub>), 79.13 (C<sub>3b</sub>), 76.75 (C<sub>2a</sub>), 75.63 (C<sub>4a</sub>), 74.90 ( $CH_2$  *benzylic*), 74.02 (C<sub>1a</sub>), 73.84 (C<sub>5a</sub>), 72.91 (C<sub>3a</sub>), 68.69 (C<sub>6b</sub>), 66.07 (C<sub>5b</sub>), 65.89 (C<sub>2b</sub>), 51.60, 48.05, 45.17, 29.70, 27.02, 20.46, 20.14, 17.53, 17.39, 17.35, 17.29, 17.19, 17.08, 17.00, 12.93, 12.69, 12.22, 11.99, 9.97 (C, CH *L-camphor* + *TIPDS*). FAB-MS:  $m/z$  922  $M^+$ , 944 ( $M + Na$ ) $^+$ . Anal. calcd. for  $C_{48}H_{71}O_{11}N_3Si_2$ : C 62.51%; H 7.76%; N 4.56%; found C 62.67%; H 7.47%; N 4.69%.

Data for **50**: TLC (hexane/AcOEt 4/1)  $R_f$  = 0.17;  $[\alpha]_{D}^{20}$  = + 6.8 ( $c$  = 1.0,  $CHCl_3$ ).  $^1H$ -RMN ( $CDCl_3$ , 500 MHz):  $\delta$  7.48 (m, 2H, ArH), 7.40-7.27 (m, 8H, ArH), 5.57 (s, 1H,  $CH_{benzylic}$  *benzylidene*), 5.48 (d,  $J_{1,2}$  = 4.0 Hz, 1H, H<sub>1b</sub>), 4.97 (d,  $J$  = 11.0 Hz, 1H,  $CH_{benzylic}$ ), 4.80 (d,  $J$  = 11.0 Hz, 1H,  $CH_{benzylic}$ ), 4.38 (td,  $J_{5,6}$  = 5.0 Hz,  $J_{5,4}$  =  $J_{5,6'}$  = 10.0 Hz, 1H, H<sub>5b</sub>), 4.29 (dd,  $J_{6,5}$  = 5.0 Hz,  $J_{6,6'}$  = 10.0 Hz, 1H, H<sub>6b</sub>), 4.20 (t,  $J_{2,1}$  =  $J_{2,3}$  = 5.0 Hz, 1H, H<sub>2a</sub>), 4.17 (t,  $J_{4,3}$  =  $J_{4,5}$  = 9.5 Hz, 1H, H<sub>4a</sub>), 4.10 (t,  $J_{3,2}$  =  $J_{3,4}$  = 9.5 Hz, 1H, H<sub>3b</sub>), 3.90 (dd,  $J_{3,2}$  = 4.0 Hz,  $J_{3,4}$  = 9.5 Hz, 1H, H<sub>3a</sub>), 3.82 (t,  $J_{1,2}$  =  $J_{1,6}$  = 6.0 Hz, 1H, H<sub>1a</sub>), 3.713 (t,  $J_{6',5}$  =  $J_{6',6}$  = 10.0 Hz, 1H, H<sub>6b'</sub>), 3.710 (t,  $J_{4,3}$  =  $J_{4,5}$  = 9.0 Hz, 1H, H<sub>4b</sub>), 3.65 (ddd,  $J_{6,OH}$  = 3.5 Hz,  $J_{6,1}$  = 7.0 Hz,  $J_{6,5}$  = 10.0 Hz, 1H, H<sub>6a</sub>), 3.47 (t,  $J_{5,4}$  =  $J_{5,6}$  = 9.5 Hz, 1H, H<sub>5a</sub>), 3.42 (dd,  $J_{2,1}$  = 4.0 Hz,  $J_{2,3}$  = 10.0 Hz, 1H, H<sub>2b</sub>), 2.65 (d,  $J_{OH,6}$  = 3.0 Hz, 1H, OH), 1.94 (m, 2H, *L-camphor*), 1.71 (m, 2H, *L-camphor*), 1.48 (d,  $J$  = 13.0 Hz, 1H, *L-camphor*), 1.39 (m, 1H, *L-camphor*), 1.25 (m, 1H, *L-camphor*), 1.17-0.95 (m, 31H, *L-camphor* + *TIPDS*), 0.85 (s, 3H,  $CH_3$  *L-camphor*), 0.82 (s, 3H,  $CH_3$  *L-camphor*).  $^{13}C$ -RMN ( $CDCl_3$ , 125 MHz):  $\delta$  138.0, 137.40 (ArC), 128.89, 128.37, 128.12, 127.79, 125.99 (ArCH), 117.96 ( $C_{acetalic}$

*L-camphor*), 101.14 ( $\text{CH}_{\text{benzylic}} \text{benzylidene}$ ), 98.60 ( $\text{C}_{1\text{b}}$ ), 82.63 ( $\text{C}_{4\text{b}}$ ), 78.15 ( $\text{C}_{5\text{a}}$ ), 76.60 ( $\text{C}_{1\text{a}}$ ), 76.47 ( $\text{C}_{3\text{b}}$ ), 76.44 ( $\text{C}_{2\text{a}}$ ), 76.08 ( $\text{C}_{4\text{a}}$ ), 75.22 ( $\text{C}_{6\text{a}}$ ), 74.98 ( $\text{CH}_2 \text{ benzylic}$ ), 73.30 ( $\text{C}_{3\text{a}}$ ), 68.77 ( $\text{C}_{6\text{b}}$ ), 63.08 ( $\text{C}_{2\text{b}}$ ), 62.47 ( $\text{C}_{5\text{b}}$ ), 51.53, 48.01, 45.14, 45.12, 29.43, 27.03, 20.42, 19.99, 17.67, 17.58, 17.32, 17.27, 17.23, 17.22, 17.13, 13.02, 12.75, 12.37, 12.07, 9.86 ( $\text{C}$ ,  $\text{CH L-camphor} + \text{TIPDS}$ ). FAB-MS:  $m/z$  922  $\text{M}^+$ , 944 ( $\text{M} + \text{Na}$ ) $^+$ . Anal. calcd. for  $\text{C}_{48}\text{H}_{71}\text{O}_{11}\text{N}_3\text{Si}_2$ : C 62.51%; H 7.76%; N 4.56%; found C 62.13%; H 8.01%; N 4.36%.

**2-Azido-4,6-*O*-benzylidene-2-deoxy-3-*O*-*p*-methoxybenzyl- $\alpha$ -D-glucopyranosyl-(1 $\rightarrow$ 6)-3,4-*O*-(1,1,3,3-tetraisopropylidisiloxane-1,3-di-yl)-1,2-*O*-(L-1,7,7-trimethyl-[2,2,1]-bicyclohept-2-ylidene)-D-*myo*-inositol 47.** To a solution of **45** (500 mg, 0.896 mmol) and **37**<sup>7</sup> (416 mg, 0.747 mmol) in dry  $\text{Et}_2\text{O}$  (15 mL) with 4Å molecular sieves under an argon atmosphere, TMSOTf (7  $\mu\text{l}$ , 0.039 mmol) at  $-40^\circ\text{C}$  was added. The solution was stirred for 2 h, neutralised with  $\text{Et}_3\text{N}$  and concentrated in *vacuo*. The residue was purified by flash chromatography (hexane/AcOEt 19/1, 14/1, 9/1, 4/1, 2/1) to yield 470 mg (66%) of  $\alpha$ -(1 $\rightarrow$ 6) isomer **47**, 28 mg (4%) of  $\beta$ -(1 $\rightarrow$ 6) isomer **49** and 100 mg (14%) of  $\alpha$ -(1 $\rightarrow$ 5) isomer **51** as white foams. *Data for 47*: TLC (hexane/AcOEt 4/1)  $R_f = 0.43$ ;  $[\alpha]_{\text{D}}^{20} = +28.0$  ( $c = 0.7$ ,  $\text{CHCl}_3$ ).  $^1\text{H}$ -RMN ( $\text{CDCl}_3$ , 500 MHz):  $\delta$  7.51 (m, 2H, ArH *benzylidene*), 7.38 (m, 3H, ArH *benzylidene*), 7.32 (d,  $J = 8.5$  Hz, 2H, ArH *PMB*), 6.85 (d,  $J = 8.5$  Hz, 2H, ArH *PMB*), 5.58 (s, 1H,  $\text{CH}_{\text{benzylic}} \text{benzylidene}$ ), 5.39 (d,  $J_{1,2} = 3.5$  Hz, 1H,  $\text{H}_{1\text{b}}$ ), 4.90 (d,  $J = 11.0$  Hz, 1H,  $\text{CH}_{\text{benzylic}} \text{PMB}$ ), 4.74 (d,  $J = 11.0$  Hz, 1H,  $\text{CH}_{\text{benzylic}} \text{PMB}$ ), 4.40 (td,  $J_{5,6} = 5.0$  Hz,  $J_{5,4} = J_{5,6'} = 10.0$  Hz, 1H,  $\text{H}_{5\text{b}}$ ), 4.28 (dd,  $J_{6,5} = 5.0$  Hz,  $J_{6,6'} = 10.0$  Hz, 1H,  $\text{H}_{6\text{b}}$ ), 4.20 (t,  $J_{2,1} = J_{2,3} = 5.0$  Hz, 1H,  $\text{H}_{2\text{a}}$ ), 4.10 (t,  $J_{3,2} = J_{3,4} = 9.5$  Hz, 1H,  $\text{H}_{3\text{b}}$ ), 4.04 (t,  $J_{1,2} = J_{1,6} = 6.0$  Hz, 1H,  $\text{H}_{1\text{a}}$ ), 3.93 (dd,  $J_{3,2} = 4.0$  Hz,  $J_{3,4} = 9.0$  Hz, 1H,  $\text{H}_{3\text{a}}$ ), 3.86 (t,  $J_{4,3} = J_{4,5} = 9.5$  Hz, 1H,  $\text{H}_{4\text{a}}$ ), 3.79 (s, 3H,  $\text{CH}_3\text{O PMB}$ ), 3.74 (dd,  $J_{6,1} = 6.0$  Hz,  $J_{6,5} = 10.0$  Hz, 1H,  $\text{H}_{6\text{a}}$ ), 3.72 (t,  $J_{6',5} = J_{6',6} = 10.0$  Hz, 1H,  $\text{H}_{6\text{b}'}$ ), 3.68 (t,  $J_{4,3} = J_{4,5} = 9.5$  Hz, 1H,  $\text{H}_{4\text{b}}$ ), 3.42 (t,  $J_{5,4} = J_{5,6} = 9.5$  Hz, 1H,  $\text{H}_{5\text{a}}$ ), 3.38 (dd,  $J_{2,1} = 3.5$  Hz,  $J_{2,3} = 9.5$  Hz, 1H,  $\text{H}_{2\text{b}}$ ), 2.56 (s, 1H, OH), 1.96 (m, 1H, *L-camphor*), 1.87 (m, 1H, *L-camphor*), 1.71 (m, 2H, *L-camphor*), 1.49 (d,  $J = 13.0$  Hz, 1H, *L-camphor*), 1.39 (m, 1H, *L-camphor*), 1.24 (m, 1H, *L-camphor*), 1.13-0.93 (m, 31H, *L-camphor} + \text{TIPDS}), 0.85 (s, 3H,  $\text{CH}_3 \text{ L-camphor}$ ), 0.83 (s, 3H,  $\text{CH}_3 \text{ L-camphor}$ ).  $^{13}\text{C}$ -RMN ( $\text{CDCl}_3$ , 125 MHz):  $\delta$  159.37 (ArC *PMB*), 137.49 (ArC *benzylidene*), 130.22 (ArC *PMB*), 129.87 (2 x ArCH *PMB*), 128.87 (ArCH *benzylidene*), 128.19 (2 x ArCH *benzylidene*), 126.04 (2 x ArCH *benzylidene*), 117.76 ( $\text{C}_{\text{acetalic}} \text{ L-camphor}$ ), 113.83 (2 x ArCH *PMB*), 101.28 ( $\text{CH}_{\text{benzylic}} \text{benzylidene}$ ), 96.98 ( $\text{C}_{1\text{b}}$ ), 82.83 ( $\text{C}_{4\text{b}}$ ), 80.10 ( $\text{C}_{6\text{a}}$ ), 77.00 ( $\text{C}_{2\text{a}}$ ), 76.19 ( $\text{C}_{1\text{a}}$ ), 76.01 ( $\text{C}_{3\text{b}}$ ), 75.77 ( $\text{C}_{4\text{a}}$ ), 74.71 ( $\text{CH}_2 \text{ benzylic PMB}$ ), 72.74 ( $\text{C}_{3\text{a}}$ ), 72.18 ( $\text{C}_{5\text{a}}$ ), 68.99 ( $\text{C}_{6\text{b}}$ ), 63.14 ( $\text{C}_{2\text{b}}$ ), 62.33 ( $\text{C}_{5\text{b}}$ ), 55.26 ( $\text{CH}_3\text{O PMB}$ ), 51.51, 48.00, 45.22, 45.16, 29.54, 27.04, 20.46, 20.15, 17.53, 17.39, 17.36, 17.29, 17.20, 17.10, 17.01, 12.93, 12.73, 12.23, 12.02, 9.79 ( $\text{C}$ ,  $\text{CH L-camphor} +$*

TIPDS). FAB-MS:  $m/z$  951  $M^+$ , 974 ( $M + Na$ ) $^+$ . Anal. calcd. for  $C_{49}H_{73}O_{12}N_3Si_2$ : C 61.80%; H 7.73%; N 4.41%; found C 61.77%; H 7.49%; N 4.53%.

Data for **49**: TLC (hexane/AcOEt 4/1)  $R_f$  = 0.38;  $[\alpha]^{20}_D$  = -39.9 ( $c$  = 0.9,  $CHCl_3$ ).  $^1H$ -RMN ( $CDCl_3$ , 500 MHz):  $\delta$  7.47 (m, 2H, ArH benzylidene), 7.38 (m, 3H, ArH benzylidene), 7.29 (d,  $J$  = 8.5 Hz, 2H, ArH PMB), 6.84 (d,  $J$  = 8.5 Hz, 2H, ArH PMB), 5.56 (s, 1H,  $CH_{benzylic}$  benzylidene), 4.82 (d,  $J$  = 11.0 Hz, 1H,  $CH_{benzylic}$  PMB), 4.77 (d,  $J_{1,2}$  = 8.0 Hz, 1H,  $H_{1b}$ ), 4.72 (d,  $J$  = 11.0 Hz, 1H,  $CH_{benzylic}$  PMB), 4.31 (dd,  $J_{6,5}$  = 5.0 Hz,  $J_{6,6'}$  = 10.5 Hz, 1H,  $H_{6b}$ ), 4.22 (t,  $J_{2,1}$  =  $J_{2,3}$  = 4.5 Hz, 1H,  $H_{2a}$ ), 3.93 (dd,  $J_{3,2}$  = 4.0 Hz,  $J_{3,4}$  = 9.0 Hz, 1H,  $H_{3a}$ ), 3.92 (dd,  $J_{1,2}$  = 5.0 Hz,  $J_{1,6}$  = 7.5 Hz, 1H,  $H_{1a}$ ), 3.843 (t,  $J_{6',5}$  =  $J_{6',6}$  = 10.0 Hz, 1H,  $H_{6b'}$ ), 3.837 (t,  $J_{4,3}$  =  $J_{4,5}$  = 9.5 Hz, 1H,  $H_{4a}$ ), 3.79 (s, 3H,  $CH_3O$  PMB), 3.73 (t,  $J_{4,3}$  =  $J_{4,5}$  = 9.5 Hz, 1H,  $H_{4b}$ ), 3.68 (dd,  $J_{6,1}$  = 7.0 Hz,  $J_{6,5}$  = 10.5 Hz, 1H,  $H_{6a}$ ), 3.56 (m, 2H,  $H_{2b}$  +  $H_{3b}$ ), 3.51 (td,  $J_{5,OH}$  = 1.5 Hz,  $J_{5,4}$  =  $J_{5,6}$  = 9.5 Hz, 1H,  $H_{5a}$ ), 3.42 (td,  $J_{5,6}$  = 5.0 Hz,  $J_{5,4}$  =  $J_{5,6'}$  = 10.0 Hz, 1H,  $H_{5b}$ ), 2.81 (d,  $J_{OH,5}$  = 1.5 Hz, 1H, OH), 1.98 (m, 2H, L-camphor), 1.71 (m, 2H, L-camphor), 1.53 (d,  $J$  = 13.0 Hz, 1H, L-camphor), 1.37 (m, 1H, L-camphor), 1.27 (m, 1H, L-camphor), 1.14-0.97 (m, 31H, L-camphor + TIPDS), 0.86 (s, 3H,  $CH_3$  L-camphor), 0.85 (s, 3H,  $CH_3$  L-camphor).  $^{13}C$ -RMN ( $CDCl_3$ , 125 MHz):  $\delta$  159.36 (ArC PMB), 137.26 (ArC benzylidene), 129.96 (2 x ArC PMB + ArCH PMB), 128.97 (ArCH benzylidene), 128.23 (2 x ArCH benzylidene), 125.96 (2 x ArCH benzylidene), 117.63 ( $C_{acetalic}$  L-camphor), 113.77 (2 x ArCH PMB), 102.98 ( $C_{1b}$ ), 101.23 ( $CH_{benzylic}$  benzylidene), 83.49 ( $C_{6a}$ ), 81.44 ( $C_{4b}$ ), 78.70 ( $C_{3b}$ ), 76.75 ( $C_{2a}$ ), 75.62 ( $C_{4a}$ ), 74.56 ( $CH_2$  benzylic PMB), 74.01 ( $C_{1a}$ ), 73.84 ( $C_{5a}$ ), 72.93 ( $C_{3a}$ ), 68.70 ( $C_{6b}$ ), 66.11 ( $C_{5b}$ ), 65.86 ( $C_{2b}$ ), 55.24 ( $CH_3O$  PMB), 51.60, 48.05, 45.18, 29.71, 27.02, 20.46, 20.14, 17.54, 17.40, 17.36, 17.35, 17.30, 17.20, 17.08, 17.00, 12.94, 12.70, 12.23, 12.00, 9.98 (C, CH L-camphor + TIPDS). FAB-MS:  $m/z$  951  $M^+$ , 974 ( $M + Na$ ) $^+$ . Anal. calcd. for  $C_{49}H_{73}O_{12}N_3Si_2$ : C 61.80%; H 7.73%; N 4.41%; found C 61.61%; H 7.40%; N 4.43%.

Data for **51**: TLC (hexane/AcOEt 4/1)  $R_f$  = 0.19;  $[\alpha]^{20}_D$  = +3.9 ( $c$  = 0.9,  $CHCl_3$ ).  $^1H$ -RMN ( $CDCl_3$ , 500 MHz):  $\delta$  7.49 (m, 2H, ArH benzylidene), 7.38 (m, 3H, ArH benzylidene), 7.31 (d,  $J$  = 9.0 Hz, 2H, ArH PMB), 6.85 (d,  $J$  = 9.0 Hz, 2H, ArH PMB), 5.57 (s, 1H,  $CH_{benzylic}$  benzylidene), 5.46 (d,  $J_{1,2}$  = 4.0 Hz, 1H,  $H_{1b}$ ), 4.89 (d,  $J$  = 10.5 Hz, 1H,  $CH_{benzylic}$  PMB), 4.73 (d,  $J$  = 10.5 Hz, 1H,  $CH_{benzylic}$  PMB), 4.36 (td,  $J_{5,6}$  = 5.0 Hz,  $J_{5,4}$  =  $J_{5,6'}$  = 10.0 Hz, 1H,  $H_{5b}$ ), 4.28 (dd,  $J_{6,5}$  = 5.0 Hz,  $J_{6,6'}$  = 10.0 Hz, 1H,  $H_{6b}$ ), 4.20 (t,  $J_{2,1}$  =  $J_{2,3}$  = 5.0 Hz, 1H,  $H_{2a}$ ), 4.16 (t,  $J_{4,3}$  =  $J_{4,5}$  = 9.5 Hz, 1H,  $H_{4a}$ ), 4.08 (t,  $J_{3,2}$  =  $J_{3,4}$  = 9.5 Hz, 1H,  $H_{3b}$ ), 3.90 (dd,  $J_{3,2}$  = 4.0 Hz,  $J_{3,4}$  = 9.5 Hz, 1H,  $H_{3a}$ ), 3.81 (t,  $J_{1,2}$  =  $J_{1,6}$  = 6.0 Hz, 1H,  $H_{1a}$ ), 3.79 (s, 3H,  $CH_3O$  PMB), 3.71 (t,  $J_{6',5}$  =  $J_{6',6}$  = 10.0 Hz, 1H,  $H_{6b'}$ ), 3.69 (t,  $J_{4,3}$  =  $J_{4,5}$  = 10.0 Hz, 1H,  $H_{4b}$ ), 3.65 (ddd,  $J_{6,OH}$  = 3.5 Hz,  $J_{6,1}$  = 6.5 Hz,  $J_{6,5}$  = 9.5 Hz, 1H,  $H_{6a}$ ), 3.47 (t,  $J_{5,4}$  =  $J_{5,6}$  = 9.5 Hz, 1H,  $H_{5a}$ ), 3.41 (dd,  $J_{2,1}$  = 4.0 Hz,  $J_{2,3}$  = 9.5 Hz, 1H,  $H_{2b}$ ), 2.62 (d,  $J_{OH,6}$  = 3.5 Hz, 1H, OH), 1.95 (m, 2H, L-camphor), 1.71 (m, 2H, L-camphor), 1.48 (d,  $J$  = 13.0 Hz, 1H, L-camphor), 1.39 (m, 1H, L-camphor), 1.24 (m, 1H, L-camphor), 1.17-

0.95 (m, 3H, *L-camphor* + *TIPDS*), 0.85 (s, 3H,  $\text{CH}_3$  *L-camphor*), 0.82 (s, 3H,  $\text{CH}_3$  *L-camphor*).  $^{13}\text{C}$ -RMN ( $\text{CDCl}_3$ , 125 MHz):  $\delta$  159.37 (ArC *PMB*), 137.40 (ArC *benzylidene*), 130.18 (ArC *PMB*), 129.82 (2 x ArCH *PMB*), 128.92 (ArCH *benzylidene*), 128.17 (2 x ArCH *benzylidene*), 126.02 (2 x ArCH *benzylidene*), 117.88 ( $\text{C}_{\text{acetalic}}$  *L-camphor*), 113.82 (2 x ArCH *PMB*), 101.21 ( $\text{CH}_{\text{benzylic}}$  *benzylidene*), 98.66 ( $\text{C}_{1\text{b}}$ ), 82.62 ( $\text{C}_{4\text{b}}$ ), 78.52 ( $\text{C}_{5\text{a}}$ ), 76.45 ( $\text{C}_{1\text{a}}$ ), 76.41 ( $\text{C}_{2\text{a}}$ ), 76.25 ( $\text{C}_{3\text{b}}$ ), 76.08 ( $\text{C}_{4\text{a}}$ ), 75.22 ( $\text{C}_{6\text{a}}$ ), 74.70 ( $\text{CH}_2$  *benzylic* *PMB*), 73.35 ( $\text{C}_{3\text{a}}$ ), 68.77 ( $\text{C}_{6\text{b}}$ ), 63.10 ( $\text{C}_{2\text{b}}$ ), 62.58 ( $\text{C}_{5\text{b}}$ ), 55.25 ( $\text{CH}_3\text{O}$  *PMB*), 51.49, 48.02, 45.22, 45.16, 29.43, 27.08, 20.44, 20.05, 17.67, 17.58, 17.32, 17.28, 17.24, 17.13, 13.03, 12.76, 12.37, 12.09, 9.89 (C, CH *L-camphor* + *TIPDS*). FAB-MS:  $m/z$  952  $\text{M}^+$ , 974 ( $\text{M} + \text{Na}$ ) $^+$ . Anal. calcd. for  $\text{C}_{49}\text{H}_{73}\text{O}_{12}\text{N}_3\text{Si}_2$ : C 61.80%; H 7.73%; N 4.41%; found C 61.77%; H 7.67%; N 4.19%.

**2-Azido-3-*O*-benzyl-4,6-*O*-benzylidene-2-deoxy- $\alpha$ -D-glucopyranosyl-(1 $\rightarrow$ 6)-3,4,5-tri-*O*-benzyl-1,2-*O*-(*L*-1,7,7-trimethyl-[2,2,1]-bicyclohept-2-ylidene)-D-*myo*-inositol 52.** To a solution of **46** (1.37 g, 1.49 mmol) in dry THF (30 mL) under an argon atmosphere, TBAF (1.0 M solution in THF, 4.5 mL) was added. The solution was stirred for 1 h, diluted with AcOEt (100 mL) and washed with sat.  $\text{NaHCO}_3$  solution (100 mL). The aqueous layer was extracted with AcOEt (2 x 50 mL) and the combined organic layers were dried over  $\text{MgSO}_4$ , concentrated in *vacuo* and coevaporated with dry toluene (2 x 30 mL). To a solution of the above residue in dry DMF (30 mL) under an argon atmosphere, NaH (535 mg 60% in mineral oil, 13.376 mmol) first and then BnBr (1.6 mL, 13.5 mmol) were added. The solution was stirred for 10 h and  $\text{NH}_3$  al 30% (1.5 mL) at  $0^\circ\text{C}$  was added. After 10 min the mixture was diluted with AcOEt (100 mL) and washed with 10 % HCl solution (100 mL). The aqueous layer was extracted with AcOEt (2 x 50 mL) and the combined organic layers were washed with sat. NaCl solution (3 x 250 mL), dried over  $\text{MgSO}_4$  and concentrated in *vacuo*. The residue was purified by flash chromatography (hexane/AcOEt, 19/1, 14/1, 9/1) to yield 1.34 g (95%) of **52** as a white foam.  $[\alpha]_{\text{D}}^{20} = +50.9$  ( $c = 1.0$ ,  $\text{CHCl}_3$ ).  $^1\text{H}$ -RMN ( $\text{CDCl}_3$ , 500 MHz):  $\delta$  7.43 (m, 2H, ArH), 7.41-7.23 (m, 20H, ArH), 7.15-7.05 (m, 3H, ArH), 5.58 (d,  $J_{1,2} = 3.5$  Hz, 1H,  $\text{H}_{1\text{b}}$ ), 5.56 (s, 1H,  $\text{CH}_{\text{benzylic}}$  *benzylidene*), 4.91 (d,  $J = 11.0$  Hz, 1H,  $\text{CH}_{\text{benzylic}}$ ), 4.78 (d,  $J = 11.5$  Hz, 1H,  $\text{CH}_{\text{benzylic}}$ ), 4.76 (d,  $J = 11.5$  Hz, 1H,  $\text{CH}_{\text{benzylic}}$ ), 4.74 (d,  $J = 12.0$  Hz, 1H,  $\text{CH}_{\text{benzylic}}$ ), 4.71 (d,  $J = 11.5$  Hz, 1H,  $\text{CH}_{\text{benzylic}}$ ), 4.69 (d,  $J = 12.0$  Hz, 1H,  $\text{CH}_{\text{benzylic}}$ ), 4.68 (d,  $J = 11.5$  Hz, 1H,  $\text{CH}_{\text{benzylic}}$ ), 4.67 (d,  $J = 10.5$  Hz, 1H,  $\text{CH}_{\text{benzylic}}$ ), 4.28 (dd,  $J_{2,3} = 3.5$  Hz,  $J_{2,1} = 6.0$  Hz, 1H,  $\text{H}_{2\text{a}}$ ), 4.18 (m, 2H,  $\text{H}_{5\text{b}} + \text{H}_{6\text{b}}$ ), 4.01 (t,  $J_{3,2} = J_{3,4} = 9.5$  Hz, 1H,  $\text{H}_{3\text{b}}$ ), 3.99 (m, 2H,  $\text{H}_{1\text{a}} + \text{H}_{6\text{a}}$ ), 3.82 (t,  $J_{4,3} = J_{4,5} = 8.0$  Hz, 1H,  $\text{H}_{4\text{a}}$ ), 3.78 (dd,  $J_{3,2} = 4.0$  Hz,  $J_{3,4} = 8.0$  Hz, 1H,  $\text{H}_{3\text{a}}$ ), 3.70 (t,  $J_{4,3} = J_{4,5} = 9.5$  Hz, 1H,  $\text{H}_{4\text{b}}$ ), 3.68 (t,  $J_{6,5} = J_{6,6} = 10.0$  Hz, 1H,  $\text{H}_{6\text{b}'}$ ), 3.43 (dd,  $J_{5,4} = 7.0$  Hz,  $J_{5,6} = 9.5$  Hz, 1H,  $\text{H}_{5\text{a}}$ ), 3.35 (dd,  $J_{2,1} = 3.5$  Hz,  $J_{2,3} = 10.0$  Hz, 1H,  $\text{H}_{2\text{b}}$ ), 1.91 (m, 1H, *L-camphor*), 1.86 (m, 1H, *L-camphor*), 1.76 (m, 1H, *L-camphor*), 1.72 (m, 1H, *L-camphor*), 1.46 (d,  $J = 13.0$  Hz, 1H, *L-camphor*), 1.39 (m, 1H, *L-*

*camphor*), 1.21 (m, 1H, *L-camphor*), 1.07 (s, 3H,  $CH_3$  *L-camphor*), 0.87 (s, 3H,  $CH_3$  *L-camphor*), 0.86 (s, 3H,  $CH_3$  *L-camphor*).  $^{13}C$ -RMN ( $CDCl_3$ , 125 MHz):  $\delta$  138.49, 138.30, 137.86, 137.77, 137.53 (ArC), 128.80, 128.37, 128.35, 128.33, 128.29, 128.26, 128.04, 127.80, 127.68, 127.68, 127.53, 126.19 (ArCH), 118.04 ( $C_{acetalic}$  *L-camphor*), 101.28 ( $CH_{benzylic}$  *benzylidene*), 95.88 ( $C_{1b}$ ), 82.97 ( $C_{4b}$ ), 80.55 ( $C_{4a} + C_{5a}$ ), 77.91 ( $C_{6a}$ ), 76.92 ( $C_{3a}$ ), 75.91 ( $C_{1a}$ ), 75.40 ( $CH_2$  *benzylic*), 75.31 ( $C_{3b}$ ), 74.77, 74.73 ( $CH_2$  *benzylic*), 73.93 ( $C_{2a}$ ), 72.54 ( $CH_2$  *benzylic*), 68.79 ( $C_{6b}$ ), 62.93 ( $C_{2b}$ ), 62.52 ( $C_{5b}$ ), 51.57, 47.92 (C *L-camphor*), 45.12 (CH *L-camphor*), 44.86, 29.81, 26.96 ( $CH_2$  *L-camphor*), 20.58, 20.34, 9.64 ( $CH_3$  *L-camphor*). FAB-MS:  $m/z$  472 (M + Na) $^+$ . Anal. calcd. for  $C_{57}H_{63}O_{10}N_3$ : C 72.06%; H 6.68%; N 4.42%; found C 71.81%; H 6.42%; N 4.36%.

**2-Azido-3,6-di-*O*-benzyl-2-deoxy- $\alpha$ -D-glucopyranosyl-(1 $\rightarrow$ 6)-3,4,5-tri-*O*-benzyl-1,2-*O*-(L-1,7,7-trimethyl-[2,2,1]-bicyclohept-2-ylidene)-D-*myo*-inositol 53.**<sup>8</sup> To a solution of **52** (600 mg, 0.632 mmol) in dry THF (12.6 mL) with 3Å molecular sieves under an argon atmosphere,  $NaCNBH_3$  (1.0 M solution in THF, 6.3 mL) first and HCl (1.0 M solution in  $Et_2O$ , 6.5 mL) dropwise then, were added. The solution was stirred for 5 min, diluted with AcOEt (50 mL) and quickly washed with sat.  $NaHCO_3$  (50 mL). The aqueous layer was extracted with AcOEt (2 x 50 mL) and the combined organic layers were dried over  $MgSO_4$  and concentrated in *vacuo*. The residue was purified by flash chromatography (hexane/AcOEt 9/1) to yield 541 mg (90%) of **53** as a white foam.  $^1H$ -RMN ( $CDCl_3$ , 500 MHz):  $\delta$  7.41 (m, 2H, ArH), 7.38-7.21 (m, 23H, ArH), 5.57 (d,  $J_{1,2} = 3.5$  Hz, 1H,  $H_{1b}$ ), 4.88 (d,  $J = 11.5$  Hz, 1H,  $CH_{benzylic}$ ), 4.83 (d,  $J = 11.0$  Hz, 1H,  $CH_{benzylic}$ ), 4.80 (d,  $J = 11.0$  Hz, 1H,  $CH_{benzylic}$ ), 4.78 (d,  $J = 11.0$  Hz, 1H,  $CH_{benzylic}$ ), 4.74 (d,  $J = 12.0$  Hz, 1H,  $CH_{benzylic}$ ), 4.692 (d,  $J = 10.5$  Hz, 1H,  $CH_{benzylic}$ ), 4.690 (d,  $J = 12.0$  Hz, 1H,  $CH_{benzylic}$ ), 4.64 (d,  $J = 11.0$  Hz, 1H,  $CH_{benzylic}$ ), 4.47 (d,  $J = 12.5$  Hz, 1H,  $CH_{benzylic}$ ), 4.41 (d,  $J = 12.5$  Hz, 1H,  $CH_{benzylic}$ ), 4.28 (dd,  $J_{2,3} = 3.5$  Hz,  $J_{2,1} = 5.5$  Hz, 1H,  $H_{2a}$ ), 4.01 (m, 2H,  $H_{1a} + H_{6a}$ ), 3.98 (dt,  $J_{5,6} = J_{5,6'} = 4.5$  Hz,  $J_{5,4} = 9.5$  Hz, 1H,  $H_{5b}$ ), 3.80 (m, 2H,  $H_{4a} + H_{3a}$ ), 3.78 (t,  $J_{3,2} = J_{3,4} = 9.5$  Hz, 1H,  $H_{3b}$ ), 3.74 (td,  $J_{4,OH} = 3.0$  Hz,  $J_{4,3} = J_{4,5} = 9.0$  Hz, 1H,  $H_{4b}$ ), 3.49 (dd,  $J_{6,5} = 4.0$  Hz,  $J_{6,6'} = 10.5$  Hz, 1H,  $H_{6b}$ ), 3.45 (dd,  $J_{6',5} = 4.5$  Hz,  $J_{6',6} = 10.5$  Hz, 1H,  $H_{6b'}$ ), 3.43 (br t,  $J_{5,4} = J_{5,6} = 9.0$  Hz, 1H,  $H_{5a}$ ), 3.30 (dd,  $J_{2,1} = 3.0$  Hz,  $J_{2,3} = 9.5$  Hz, 1H,  $H_{2b}$ ), 2.13 (d,  $J_{OH,4} = 3.0$  Hz, 1H, OH), 1.89 (m, 2H, *L-camphor*), 1.75 (m, 1H, *L-camphor*), 1.71 (m, 1H, *L-camphor*), 1.46 (d,  $J = 13.0$  Hz, 1H, *L-camphor*), 1.37 (m, 1H, *L-camphor*), 1.22 (m, 1H, *L-camphor*), 1.07 (s, 3H,  $CH_3$  *L-camphor*), 0.87 (s, 3H,  $CH_3$  *L-camphor*), 0.84 (s, 3H,  $CH_3$  *L-camphor*).  $^{13}C$ -RMN ( $CDCl_3$ , 125 MHz):  $\delta$  138.36, 138.23, 138.10, 138.08, 137.85 (ArC), 128.39, 128.22, 128.20, 128.05, 127.76, 127.68, 127.55, 127.50, 127.46 (ArCH), 117.93 ( $C_{acetalic}$  *L-camphor*), 95.44 ( $C_{1b}$ ), 80.67 ( $C_{5a}$ ), 80.52 ( $C_{4a}$ ), 79.08 ( $C_{3b}$ ), 77.71 ( $C_{6a}$ ), 76.85 ( $C_{3a}$ ), 75.99 ( $C_{1a}$ ), 75.00, 74.66, 74.56 ( $CH_2$  *benzylic*), 73.76 ( $C_{2a}$ ), 73.27, 72.40 ( $CH_2$  *benzylic*), 72.35 ( $C_{4b}$ ), 69.47 ( $C_{5b}$ ), 69.35 ( $C_{6b}$ ), 62.62 ( $C_{2b}$ ),



51.48, 47.83 (C L-camphor), 45.03 (CH L-camphor), 44.70, 29.74, 26.88 (CH<sub>2</sub> L-camphor), 20.50, 20.28, 9.58 (CH<sub>3</sub> L-camphor).

**2-Azido-4,6-O-benzylidene-2-deoxy-3-O-p-methoxybenzyl- $\alpha$ -D-glucopyranosyl-(1 $\rightarrow$ 6)-3,4,5-tri-O-benzyl-1,2-O-(L-1,7,7-trimethyl-[2,2,1]-bicyclohept-2-ylidene)-D-myoinositol 58.**

To a solution of **47** (470 mg, 0.494 mmol) in dry THF (10 mL) under an argon atmosphere, TBAF (1.0 M solution in THF, 1.5 mL) was added. The solution was stirred for 1 h, diluted with AcOEt (50 mL) and washed with sat. NaHCO<sub>3</sub> solution (50 mL). The aqueous layer was extracted with AcOEt (2 x 25 mL) and the combined organic layers dried over MgSO<sub>4</sub>, concentrated in *vacuo* and coevaporated with dry toluene (2 x 10 mL). To a solution of the above residue in dry DMF (10 mL) under an argon atmosphere, NaH (178 mg 60% in mineral oil, 4.450 mmol) first and then BnBr (530  $\mu$ L, 4.456 mmol) were added. The solution was stirred for 10 h and NH<sub>3</sub> aq 30% (0.5 mL) at 0°C was added. After 10 min the mixture was diluted with AcOEt (50 mL) and washed with HCl aq 10% (50 mL). The aqueous layer was extracted with AcOEt (2 x 25 mL) and the combined organic layers were washed with sat. NaCl solution (3 x 100 mL), dried over MgSO<sub>4</sub> and concentrated in *vacuo*. The residue was purified by flash chromatography (hexane/AcOEt, 19/1, 14/1, 9/1) to yield 460 mg (95%) of **58** as a white foam.  $[\alpha]_D^{20} = +47.2$  ( $c = 0.3$ , CHCl<sub>3</sub>). <sup>1</sup>H-RMN (CDCl<sub>3</sub>, 500 MHz):  $\delta$  7.45 (m, 2H, ArH), 7.41-7.24 (m, 17H, ArH), 7.13 (m, 1H, ArH), 7.07 (m, 2H, ArH), 6.77 (d,  $J = 8.5$  Hz, 2H, ArH PMB), 5.58 (d,  $J_{1,2} = 3.5$  Hz, 1H, H<sub>1b</sub>), 5.56 (s, 1H, CH<sub>benzylic</sub> benzylidene), 4.83 (d,  $J = 10.5$  Hz, 1H, CH<sub>benzylic</sub>), 4.78 (d,  $J = 10.5$  Hz, 1H, CH<sub>benzylic</sub>), 4.74 (d,  $J = 12.0$  Hz, 1H, CH<sub>benzylic</sub>), 4.711 (d,  $J = 12.0$  Hz, 1H, CH<sub>benzylic</sub>), 4.705 (d,  $J = 11.0$  Hz, 1H, CH<sub>benzylic</sub>), 4.70 (d,  $J = 11.5$  Hz, 1H, CH<sub>benzylic</sub>), 4.68 (d,  $J = 12.0$  Hz, 1H, CH<sub>benzylic</sub>), 4.66 (d,  $J = 11.0$  Hz, 1H, CH<sub>benzylic</sub>), 4.27 (dd,  $J_{2,3} = 4.0$  Hz,  $J_{2,1} = 6.0$  Hz, 1H, H<sub>2a</sub>), 4.19 (m, 2H, H<sub>5b</sub> + H<sub>6b</sub>), 4.01 (t,  $J_{3,2} = J_{3,4} = 9.5$  Hz, 1H, H<sub>3b</sub>), 3.99 (m, 2H, H<sub>1a</sub> + H<sub>6a</sub>), 3.81 (t,  $J_{4,3} = J_{4,5} = 8.0$  Hz, 1H, H<sub>4a</sub>), 3.78 (dd,  $J_{3,2} = 4.0$  Hz,  $J_{3,4} = 8.5$  Hz, 1H, H<sub>3a</sub>), 3.73 (s, 3H, CH<sub>3</sub>O PMB), 3.68 (br t,  $J_{6',5} = J_{6',6} = J_{4,3} = J_{4,5} = 9.5$  Hz, 2H, H<sub>6b'</sub> + H<sub>4b</sub>), 3.42 (dd,  $J_{5,4} = 7.5$  Hz,  $J_{5,6} = 9.5$  Hz, 1H, H<sub>5a</sub>), 3.33 (dd,  $J_{2,1} = 3.5$  Hz,  $J_{2,3} = 10.0$  Hz, 1H, H<sub>2b</sub>), 1.91 (m, 1H, L-camphor), 1.85 (m, 1H, L-camphor), 1.75 (m, 1H, L-camphor), 1.72 (m, 1H, L-camphor), 1.45 (d,  $J = 13.0$  Hz, 1H, L-camphor), 1.39 (m, 1H, L-camphor), 1.21 (m, 1H, L-camphor), 1.07 (s, 3H, CH<sub>3</sub> L-camphor), 0.87 (s, 3H, CH<sub>3</sub> L-camphor), 0.86 (s, 3H, CH<sub>3</sub> L-camphor). <sup>13</sup>C-RMN (CDCl<sub>3</sub>, 125 MHz):  $\delta$  159.36 (ArC PMB), 138.55, 138.33, 137.89, 137.59 (ArC), 130.06 (ArCH), 129.87 (ArC PMB), 128.83, 128.40, 128.37, 128.29, 128.08, 127.83, 127.71, 127.58, 127.54, 126.23 (ArCH), 118.09 (C<sub>acetalic</sub> L-camphor), 113.81 (2 x ArCH PMB), 101.32 (CH<sub>benzylic</sub> benzylidene), 95.84 (C<sub>1b</sub>), 83.01 (C<sub>4b</sub>), 80.61 (C<sub>4a</sub>), 80.57 (C<sub>5a</sub>), 77.90 (C<sub>6a</sub>), 77.20 (C<sub>3a</sub>), 75.94 (C<sub>1a</sub>), 75.53 (CH<sub>2</sub> benzylic), 74.81 (C<sub>3b</sub> + CH<sub>2</sub> benzylic), 74.41 (CH<sub>2</sub> benzylic), 73.98 (C<sub>2a</sub>), 72.57 (CH<sub>2</sub> benzylic), 68.83 (C<sub>6b</sub>), 62.95 (C<sub>2b</sub>), 62.58 (C<sub>5b</sub>), 55.20 (CH<sub>3</sub>O PMB), 51.60, 47.96

(C *L-camphor*), 45.15 (CH *L-camphor*), 44.92, 29.82, 26.98 (CH<sub>2</sub> *L-camphor*), 20.61, 20.36, 9.65 (CH<sub>3</sub> *L-camphor*). HRMS *m/z* calcd. for C<sub>58</sub>H<sub>65</sub>O<sub>11</sub>N<sub>3</sub>Na<sup>+</sup>: 1002.4500 (M + Na)<sup>+</sup>; found 1002.4517 (M + Na)<sup>+</sup>. Anal. calcd. for C<sub>58</sub>H<sub>56</sub>O<sub>11</sub>N<sub>3</sub>·H<sub>2</sub>O: C 69.79%; H 6.77%; N 4.21%; found C 69.93%; H 6.95%; N 4.22%.

**6-*O*-*tert*-Butyldiphenylsilyl-2,3,4-tri-*O*-benzyl- $\alpha,\beta$ -D-mannopyranose 67.**<sup>9</sup> To a solution of **66**<sup>4</sup> (1.9 g, 2.4 mmol) in acetone (24.3 mL), H<sub>2</sub>O (132  $\mu$ L, 7.327 mmol) and NBS (650 mg, 3.652 mmol) were added at -15°C and the mixture was stirred for 30 min with exclusion of light. The solution was diluted with AcOEt (100 mL) and washed with sat. NaCl solution (100 mL). The aqueous layer was extracted with AcOEt (2 x 50 mL) and the combined organic layers were washed with sat. NaCl solution (3 x 250 mL), dried over MgSO<sub>4</sub> and concentrated in *vacuo*. The residue was purified by flash chromatography (hexane/AcOEt 9/1, 4/1, 2/1) to give an  $\alpha/\beta$  anomeric mixture of **67** (1.59 g, 95%) as a white foam. *Data for  $\alpha$ -anomer extracted from an  $\alpha/\beta = 1.0/0.4$  mixture:* <sup>1</sup>H-RMN (CDCl<sub>3</sub>, 500 MHz):  $\delta$  7.78-7.69 (m, 4H, ArH), 7.42-7.25 (m, 19H, ArH), 7.22-7.17 (m, 2H, 2 x ArH), 5.23 (br s, 1H, H<sub>1</sub>), 4.94 (d, *J* = 11.0 Hz, 1H, CH<sub>benzylic</sub>), 4.81 (d, *J* = 12.0 Hz, 1H, CH<sub>benzylic</sub>), 4.68 (d, *J* = 12.0 Hz, 1H, CH<sub>benzylic</sub>), 4.66 (br s, 2H, CH<sub>2</sub> benzylic), 4.62 (d, *J* = 11.0 Hz, 1H, CH<sub>benzylic</sub>), 4.14 (t, *J*<sub>4,3</sub> = *J*<sub>4,5</sub> = 9.5 Hz, 1H, H<sub>4</sub>), 4.02 (dd, *J*<sub>6,5</sub> = 4.5 Hz, *J*<sub>6,6'</sub> = 11.5 Hz, 1H, H<sub>6</sub>), 3.99 (dd, *J*<sub>3,2</sub> = 3.0 Hz, *J*<sub>3,4</sub> = 9.5 Hz, 1H, H<sub>3</sub>), 3.90 (m, 2H, H<sub>5</sub> + H<sub>6</sub>), 3.80 (t, *J*<sub>2,1</sub> = *J*<sub>2,3</sub> = 2.5 Hz, 1H, H<sub>2</sub>), 2.97 (br d, *J*<sub>OH,1</sub> = 2.5 Hz, 1H, OH), 1.07 (s, 9H, (CH<sub>3</sub>)<sub>3</sub>C TBDPS). <sup>13</sup>C-RMN (CDCl<sub>3</sub>, 125 MHz):  $\delta$  138.60, 138.57, 138.55 (ArC), 135.89, 135.61 (ArCH TBDPS), 133.91 (ArC TBDPS), 133.41 (ArC TBDPS), 129.49, 129.47, 128.47, 128.43, 128.30, 128.23, 127.83, 127.77, 127.73, 127.70, 127.67, 127.63, 127.59, 127.55, 127.49, 127.47, 127.44, 127.40 (ArCH <sub>$\alpha+\beta$</sub> ), 92.63 (C<sub>1</sub>), 79.64 (C<sub>3</sub>), 75.58 (C<sub>2</sub>), 75.02 (CH<sub>2</sub> benzylic), 74.66 (C<sub>4</sub>), 73.13 (C<sub>5</sub>), 72.70 (CH<sub>2</sub> benzylic), 72.21 (CH<sub>2</sub> benzylic), 63.43 (C<sub>6</sub>), 26.81 ((CH<sub>3</sub>)<sub>3</sub>C TBDPS), 19.30 ((CH<sub>3</sub>)<sub>3</sub>C TBDPS). <sup>13</sup>C-RMN-undecoupled (CDCl<sub>3</sub>, 125 MHz):  $\delta$  92.63 (d, *J*<sub>C,H</sub> = 168.1 Hz, C<sub>1</sub>).

**6-*O*-*tert*-Butyldiphenylsilyl-2,3,4-tri-*O*-benzyl- $\alpha,\beta$ -D-mannopyranosyl trichloroacetimidate 68.** To a solution of **67** (1.5 g, 2.2 mmol) in dry CH<sub>2</sub>Cl<sub>2</sub> (11 mL) under an argon atmosphere, trichloroacetonitrile (3.3 mL, 32.9 mmol) and DBU (17  $\mu$ L, 0.114 mmol) was added. The solution was stirred for 2 h and concentrated in *vacuo*. The residue was purified by flash chromatography (hexane/AcOEt/Et<sub>3</sub>N 4/0.9/0.1) to yield an  $\alpha/\beta$  anomeric mixture of **68** (1.75 g, 96%) as a white foam. *RMN data for  $\alpha$ -anomer extracted from an  $\alpha/\beta = 1.0/0.2$  mixture:* <sup>1</sup>H-RMN (CDCl<sub>3</sub>, 500 MHz):  $\delta$  8.52 (s, 1H, OCNHCCl<sub>3</sub>), 7.77-7.68 (m, 4H, ArH), 7.47-7.26 (m, 19H, ArH), 7.22 (m, 2H, ArH), 6.40 (d, *J*<sub>1,2</sub> = 2.0 Hz, 1H, H<sub>1</sub>), 4.98 (d, *J* = 10.5 Hz, 1H, CH<sub>benzylic</sub>), 4.84 (d, *J* = 12.0 Hz, 1H, CH<sub>benzylic</sub>), 4.78 (d, *J* = 12.0 Hz, 1H, CH<sub>benzylic</sub>),

4.71 (d,  $J = 11.5$  Hz, 1H,  $CH_{\text{benzylic}}$ ), 4.68 (d,  $J = 10.5$  Hz, 1H,  $CH_{\text{benzylic}}$ ), 4.65 (d,  $J = 12.0$  Hz, 1H,  $CH_{\text{benzylic}}$ ), 4.32 (t,  $J_{4,3} = J_{4,5} = 9.5$  Hz, 1H,  $H_4$ ), 4.02 (dd,  $J_{6,5} = 3.5$  Hz,  $J_{6,6'} = 11.5$  Hz, 1H,  $H_6$ ), 3.98 (dd,  $J_{3,2} = 3.0$  Hz,  $J_{3,4} = 9.5$  Hz, 1H,  $H_3$ ), 3.94 (dd,  $J_{6',5} = 1.5$  Hz,  $J_{6',6} = 11.5$  Hz, 1H,  $H_{6'}$ ), 3.90 (t,  $J_{2,1} = J_{2,3} = 2.5$  Hz, 1H,  $H_2$ ), 3.89 (br dd,  $J_{5,6} = 2.5$  Hz,  $J_{5,4} = 10.0$  Hz, 1H,  $H_5$ ), 1.07 (s, 9H,  $(CH_3)_3C$  TBDPS).  $^{13}C$ -RMN ( $CDCl_3$ , 125 MHz):  $\delta$  160.42 ( $OCNHCCl_3$ ), 138.37, 138.18, 138.10 (ArC), 135.92, 135.64 (ArCH TBDPS), 133.83, 133.25 (ArC TBDPS), 129.50, 128.37, 128.30, 128.06, 127.99, 127.71, 127.66, 127.61, 127.58, 127.53 (ArCH), 96.24 ( $C_1$ ), 91.09 ( $OCNHCCl_3$ ), 79.04 ( $C_3$ ), 75.77 ( $C_5$ ), 75.36 ( $CH_2$  benzylic), 74.03 ( $C_2$ ), 73.95 ( $C_4$ ), 72.69, 72.41 ( $CH_2$  benzylic), 62.71 ( $C_6$ ), 26.75 ( $(CH_3)_3C$  TBDPS), 19.33 ( $(CH_3)_3C$  TBDPS).  $^{13}C$ -RMN-*undecoupled* ( $CDCl_3$ , 125 MHz):  $\delta$  96.24 (d,  $J_{C,H} = 175.9$  Hz,  $C_1$ ).

**Phenyl 6-*O*-*tert*-butyldiphenylsilyl-2,3,4-tri-*O*-benzyl-1-thio- $\beta$ -D-galactopyranoside 71.**

To a solution of **70**<sup>10</sup> (1.0 g, 2.3 mmol) in dry MeOH (23 mL) under an argon atmosphere MeONa (0.1 M solution in MeOH, 2.3 mL) was added. The solution was stirred for 10 min, neutralised with Amberlite IR-120 ( $H^+$ ), filtered and concentrated in *vacuo*. To a solution of this crude product and imidazol (804 mg, 11.810 mmol) in dry THF (23 mL) under an argon atmosphere, TBDPSCl (0.71 mL, 2.73 mmol) was added. The mixture was stirred for 10 h, diluted with AcOEt (50 mL) and washed with sat.  $NaHCO_3$  solution (50 mL). The aqueous layer was extracted with AcOEt (2 x 30 mL) and the combined organic layers were washed with sat. NaCl solution (3 x 100 mL), dried over  $MgSO_4$ , concentrated in *vacuo* and the resulting crude coevaporated with dry toluene (2 x 20 mL). To a solution of the above residue and TBAI (84 mg, 0.227 mmol) in dry THF (23 mL) under an argon atmosphere, NaH (409 mg 60% in mineral oil, 10.226 mmol) first and then BnBr (1.22 mL, 10.26 mmol) at 0°C were added. The mixture was stirred for 24 h, diluted with AcOEt (50 mL) and washed with HCl al 10 % (50 mL). The aqueous layer was extracted with AcOEt (2 x 25 mL) and the combined organic layers dried over  $MgSO_4$  and concentrated in *vacuo*. The residue was purified by flash chromatography (hexane/AcOEt 29/1, 19/1, 14/1, 9/1) to yield 1.33 g (75%) of **71** as a colourless syrup.  $[\alpha]_D^{20} = +19.7$  ( $c = 0.8$ ,  $CHCl_3$ ).  $^1H$ -RMN ( $CDCl_3$ , 500 MHz):  $\delta$  7.59 (m, 4H, ArH), 7.51 (m, 2H, ArH), 7.43-7.24 (m, 21H, ArH), 7.13 (m, 3H, ArH), 4.99 (d,  $J = 11.0$  Hz, 1H,  $CH_{\text{benzylic}}$ ), 4.77 (d,  $J = 12.0$  Hz, 1H,  $CH_{\text{benzylic}}$ ), 4.73 (br d,  $J = 12.0$  Hz, 2H, 2 x  $CH_{\text{benzylic}}$ ), 4.70 (d,  $J = 10.5$  Hz, 1H,  $CH_{\text{benzylic}}$ ), 4.62 (d,  $J = 11.5$  Hz, 1H,  $CH_{\text{benzylic}}$ ), 4.56 (d,  $J_{1,2} = 9.5$  Hz, 1H,  $H_1$ ), 3.98 (br d,  $J_{4,3} = 2.0$  Hz, 1H,  $H_4$ ), 3.92 (t,  $J_{2,1} = J_{2,3} = 9.5$  Hz, 1H,  $H_2$ ), 3.82 (br d,  $J_{6+6',5} = 6.5$  Hz, 2H,  $H_6 + H_{6'}$ ), 3.57 (dd,  $J_{3,2} = 2.5$  Hz,  $J_{3,4} = 9.0$  Hz, 1H,  $H_3$ ), 3.43 (t,  $J_{5,6+6'} = 6.5$  Hz, 1H,  $H_5$ ), 1.04 (s, 9H,  $(CH_3)_3C$  TBDPS).  $^{13}C$ -RMN ( $CDCl_3$ , 125 MHz):  $\delta$  138.85, 138.39, 138.33 (ArC), 135.57, 135.53 (ArCH), 134.19 (ArC *SPh*), 133.18 (2 x ArC TBDPS), 131.24, 129.77, 129.71, 128.73, 128.44,

128.31, 128.11, 127.73, 127.65, 127.54, 127.27, 126.85 (ArCH), 87.54 (C<sub>1</sub>), 84.17 (C<sub>3</sub>), 78.65 (C<sub>5</sub>), 77.00 (C<sub>2</sub>), 75.57, 74.38 (CH<sub>2</sub> benzylic), 73.61 (C<sub>4</sub>), 72.86 (CH<sub>2</sub> benzylic), 62.32 (C<sub>6</sub>), 26.90 ((CH<sub>3</sub>)<sub>3</sub>C TBDPS), 19.16 ((CH<sub>3</sub>)<sub>3</sub>C TBDPS).

**6-*O*-*tert*-Butyldiphenylsilyl-2,3,4-tri-*O*-benzyl- $\alpha,\beta$ -D-galactopyranose 72.**<sup>11</sup> To a solution of **71** (1.30 g, 1.66 mmol) in acetone (17 mL), H<sub>2</sub>O (90  $\mu$ l, 4.996 mmol) and NBS (444 mg, 2.495 mmol) were added at -15°C and the mixture was stirred for 30 min with exclusion of light. The solution was diluted with AcOEt (100 mL) and washed with sat. NaCl solution (100 mL). The aqueous layer was extracted with AcOEt (2 x 50 mL) and the combined organic layers were washed with sat. NaCl solution (3 x 250 mL), dried over MgSO<sub>4</sub> and concentrated in *vacuo*. The residue was purified by flash chromatography (hexane/AcOEt 9/1, 4/1, 2/1) to give an  $\alpha/\beta$  anomeric mixture of **72** (1.08 g, 94%) as a white foam. *RMN data for  $\alpha$ -anomer extracted from an  $\alpha/\beta = 2/1$  mixture:* <sup>1</sup>H-RMN (CDCl<sub>3</sub>, 500 MHz):  $\delta$  7.64-7.59 (m, 4H, 4 x ArH), 7.45-7.23 (m, 21H, 21 x ArH), 5.21 (d,  $J_{1,2} = 3.5$  Hz, 1H, H<sub>1</sub>), 4.99 (d,  $J = 11.5$  Hz, 1H, CH<sub>benzylic</sub>), 4.85 (d,  $J = 12.0$  Hz, 1H, CH<sub>benzylic</sub>), 4.83 (d,  $J = 11.5$  Hz, 1H, CH<sub>benzylic</sub>), 4.78 (d,  $J = 12.0$  Hz, 1H, CH<sub>benzylic</sub>), 4.71 (d,  $J = 12.0$  Hz, 1H, CH<sub>benzylic</sub>), 4.61 (d,  $J = 11.0$  Hz, 1H, CH<sub>benzylic</sub>), 4.09 (br d,  $J_{4,3} = 2.5$  Hz, 1H, H<sub>4</sub>), 4.04 (br dd,  $J_{5,6} = 5.5$  Hz,  $J_{5,6'} = 9.0$  Hz, 1H, H<sub>5</sub>), 4.03 (dd,  $J_{2,1} = 3.5$  Hz,  $J_{2,3} = 10.0$  Hz, 1H, H<sub>2</sub>), 3.92 (dd,  $J_{3,4} = 2.5$  Hz,  $J_{3,2} = 9.5$  Hz, 1H, H<sub>3</sub>), 3.83 (dd,  $J_{6',5} = 8.5$  Hz,  $J_{6',6} = 10.0$  Hz, 1H, H<sub>6'</sub>), 3.71 (dd,  $J_{6,5} = 5.5$  Hz,  $J_{6,6'} = 10.0$  Hz, 1H, H<sub>6</sub>), 2.77 (br s, 1H, OH <sub>$\alpha$</sub> ), 1.06 (s, 9H, (CH<sub>3</sub>)<sub>3</sub>C TBDPS). <sup>13</sup>C-RMN (CDCl<sub>3</sub>, 125 MHz):  $\delta$  138.72, 138.62 (ArC), 138.09 (ArC), 133.21, 133.17 (ArC TBDPS), 129.74, 129.70, 129.69, 129.64, 128.33, 128.30, 128.21, 128.16, 128.14, 128.08, 127.95, 127.90, 127.81, 127.70, 127.67, 127.65, 127.59, 127.55, 127.52, 127.47, 127.34, 127.31 (ArCH <sub>$\alpha+\beta$</sub> ), 91.80 (C<sub>1</sub>), 78.65 (C<sub>3</sub>), 76.55 (C<sub>5</sub>), 74.79 (CH<sub>2</sub> benzylic), 74.74 (C<sub>4</sub>), 73.41 (CH<sub>2</sub> benzylic), 72.84 (CH<sub>2</sub> benzylic), 70.78 (C<sub>2</sub>), 61.96 (C<sub>6</sub>), 26.87 ((CH<sub>3</sub>)<sub>3</sub>C TBDPS), 19.11 ((CH<sub>3</sub>)<sub>3</sub>C TBDPS).

**6-*O*-*tert*-Butyldiphenylsilyl-2,3,4-tri-*O*-benzyl- $\alpha,\beta$ -D-galactopyranosyl trichloroacetimidate 73.** To a solution of **72** (1.00 g, 1.45 mol) in dry CH<sub>2</sub>Cl<sub>2</sub> (7.3 mL) under an argon atmosphere, trichloroacetonitrile (2.18 mL, 21.74 mmol) and DBU (11  $\mu$ l, 0.074 mmol) was added. The solution was stirred for 1 h and concentrated in *vacuo*. The residue was purified by flash chromatography (hexane/AcOEt/Et<sub>3</sub>N 4/0.9/0.1) to yield an  $\alpha/\beta$  anomeric mixture of **73** (1.16 g, 96%) as a white foam. *RMN data for  $\alpha$ -anomer extracted from an  $\alpha/\beta = 1.0/0.2$  mixture:* <sup>1</sup>H-RMN (CDCl<sub>3</sub>, 500 MHz):  $\delta$  8.49 (s, 1H, OCNHCCl<sub>3</sub>), 7.63-7.54 (m, 4H, ArH), 7.44-7.22 (m, 21H, ArH), 6.49 (d,  $J_{1,2} = 3.5$  Hz, 1H, H<sub>1</sub>), 5.01 (d,  $J = 11.5$  Hz, 1H, CH<sub>benzylic</sub>), 4.89 (d,  $J = 12.0$  Hz, 1H, CH<sub>benzylic</sub>), 4.78 (d,  $J = 12.0$  Hz, 1H, CH<sub>benzylic</sub>), 4.74 (s, 2H, CH<sub>2</sub> benzylic), 4.67 (d,  $J = 11.0$  Hz, 1H, CH<sub>benzylic</sub>), 4.23 (dd,  $J_{2,1} = 3.5$  Hz,  $J_{2,3} = 10.0$  Hz, 1H, H<sub>2</sub>), 4.12

(br d,  $J_{4,3} = 2.0$  Hz, 1H, H<sub>4</sub>), 4.032 (m, 1H, H<sub>5</sub>), 4.027 (dd,  $J_{3,2} = 2.5$  Hz,  $J_{3,4} = 10.0$  Hz, 1H, H<sub>3</sub>), 3.81 (dd,  $J_{6,5} = 8.0$  Hz,  $J_{6,6'} = 10.5$  Hz, 1H, H<sub>6</sub>), 3.72 (dd,  $J_{6',5} = 6.0$  Hz,  $J_{6',6} = 10.0$  Hz, 1H, H<sub>6'</sub>), 1.03 (s, 9H, (CH<sub>3</sub>)<sub>3</sub>C TBDPS). <sup>13</sup>C-RMN (CDCl<sub>3</sub>, 125 MHz):  $\delta$  161.17 (OCNHCCl<sub>3</sub>), 138.66, 138.64, 138.43 (ArC), 135.49, (ArCH TBDPS), 133.22 (2 x ArC TBDPS), 129.74, 128.33, 128.21, 128.00, 127.71, 127.68, 127.60, 127.53, 127.50, 127.43 (ArCH), 95.00 (C<sub>1</sub>), 91.48 (OCNHCCl<sub>3</sub>), 78.18 (C<sub>3</sub>), 75.92 (C<sub>2</sub>), 75.07 (CH<sub>2</sub> benzylic), 74.81 (C<sub>4</sub>), 73.55 (C<sub>5</sub>), 73.17, 72.86 (CH<sub>2</sub> benzylic), 62.06 (C<sub>6</sub>), 26.86 ((CH<sub>3</sub>)<sub>3</sub>C TBDPS), 19.18 ((CH<sub>3</sub>)<sub>3</sub>C TBDPS).

### References

- 1 C. Murakata, T. Ogawa, *Carbohydr. Res.* 1992, **234**, 75-91.
- 2 A. Toepfer, R. R. Schmidt, *J. Carbohydr. Chem.* 1993, **12**, 809-822.
- 3 Patil V.J. *Tetrahedron Lett.* 1996, **37**, 1481-1484.
- 4 M. Martín-Lomas, N. Khiar, S. García, J.-L. Koessler, P. M. Nieto, T. W. Rademacher, *Chem. Eur. J.* 2000, **6**, 3608-3621.
- 5 B. La Ferla, L. Lay, M. Guerrini, L. Poletti, L. Panza, G. Russo, *Tetrahedron* 1999, **55**, 9867-9888.
- 6 J.-L. de Paz, R. Ojeda, N.-C. Reichardt, M. Martín-Lomas, *Eur. J. Org. Chem.* 2003, 3308-3324.
- 7 H. Dietrich, J. F. Espinosa, J. L. Chiara, J. Jiménez-Barbero, Y. León, I. Varela-Nieto, F. H. Cano, C. Foces-Foces, M. Martín-Lomas, *Chem. Eur. J.* 1999, **5**, 320-336.
- 8 J. Lindberg, L. Öhberg, P. J. Garegg, P. Konradsson, *Tetrahedron* 2002, **58**, 1387-1398.
- 9 J. Tamura, R.R. Schmidt, *J. Carbohydr. Chem.* 1995, **14**, 895-911.
- 10 N. Khiar, M. Martín-Lomas *J. Org. Chem.* 1995, **60**, 7017-7021.
- 11 S. Takahashi, T. Nakata *J. Org. Chem.* 2002, **67**, 5739-5752.

## Docking Calculations.

Clustering histograms and RMSD tables of Docked compounds **3** and **5-32**.

### Compound 3

#### CLUSTERING HISTOGRAM

| Clus-<br>ter<br>Rank | Lowest<br>Docked<br>Energy | Run | Mean<br>Docked<br>Energy | Num<br>in<br>Clus | Histogram |    |    |    |  |
|----------------------|----------------------------|-----|--------------------------|-------------------|-----------|----|----|----|--|
|                      |                            |     |                          |                   | 5         | 10 | 15 | 20 |  |
| 1                    | -10.40                     | 6   | -10.40                   | 1                 | #         |    |    |    |  |
| 2                    | -10.30                     | 9   | -10.30                   | 1                 | #         |    |    |    |  |
| 3                    | -9.03                      | 7   | -9.03                    | 1                 | #         |    |    |    |  |
| 4                    | -8.84                      | 1   | -8.84                    | 1                 | #         |    |    |    |  |
| 5                    | -8.31                      | 3   | -8.31                    | 1                 | #         |    |    |    |  |
| 6                    | -7.98                      | 8   | -7.98                    | 1                 | #         |    |    |    |  |
| 7                    | -7.91                      | 10  | -7.91                    | 1                 | #         |    |    |    |  |
| 8                    | -7.81                      | 5   | -7.81                    | 1                 | #         |    |    |    |  |
| 9                    | -7.75                      | 2   | -7.75                    | 1                 | #         |    |    |    |  |
| 10                   | -7.48                      | 4   | -7.48                    | 1                 | #         |    |    |    |  |

#### RMSD TABLE

| Rank | Sub-<br>Rank | Run | Docked<br>Energy | Cluster<br>RMSD | Reference<br>RMSD | Grep<br>Pattern |
|------|--------------|-----|------------------|-----------------|-------------------|-----------------|
| 1    | 1            | 6   | -10.40           | 0.00            | 8.92              | RANKING         |
| 2    | 1            | 9   | -10.30           | 0.00            | 8.21              | RANKING         |
| 3    | 1            | 7   | -9.03            | 0.00            | 8.91              | RANKING         |
| 4    | 1            | 1   | -8.84            | 0.00            | 8.02              | RANKING         |
| 5    | 1            | 3   | -8.31            | 0.00            | 7.62              | RANKING         |
| 6    | 1            | 8   | -7.98            | 0.00            | 8.47              | RANKING         |
| 7    | 1            | 10  | -7.91            | 0.00            | 8.37              | RANKING         |
| 8    | 1            | 5   | -7.81            | 0.00            | 8.46              | RANKING         |
| 9    | 1            | 2   | -7.75            | 0.00            | 8.86              | RANKING         |
| 10   | 1            | 4   | -7.48            | 0.00            | 7.46              | RANKING         |

### Compound 5

#### CLUSTERING HISTOGRAM

| Clus-<br>ter<br>Rank | Lowest<br>Docked<br>Energy | Run | Mean<br>Docked<br>Energy | Num<br>in<br>Clus | Histogram |    |    |    |  |
|----------------------|----------------------------|-----|--------------------------|-------------------|-----------|----|----|----|--|
|                      |                            |     |                          |                   | 5         | 10 | 15 | 20 |  |
| 1                    | -8.90                      | 5   | -8.82                    | 2                 | ##        |    |    |    |  |
| 2                    | -8.54                      | 2   | -8.31                    | 3                 | ###       |    |    |    |  |
| 3                    | -8.18                      | 8   | -8.18                    | 1                 | #         |    |    |    |  |
| 4                    | -7.52                      | 6   | -7.35                    | 2                 | ##        |    |    |    |  |
| 5                    | -7.49                      | 10  | -7.49                    | 1                 | #         |    |    |    |  |
| 6                    | -6.48                      | 4   | -6.48                    | 1                 | #         |    |    |    |  |

Number of multi-member conformational clusters found = 3, out of 10 runs.

#### RMSD TABLE

| Rank | Sub-<br>Rank | Run | Docked<br>Energy | Cluster<br>RMSD | Reference<br>RMSD | Grep<br>Pattern |
|------|--------------|-----|------------------|-----------------|-------------------|-----------------|
| 1    | 1            | 5   | -8.90            | 0.00            | 8.11              | RANKING         |
| 1    | 2            | 7   | -8.75            | 0.83            | 8.02              | RANKING         |
| 2    | 1            | 2   | -8.54            | 0.00            | 10.17             | RANKING         |
| 2    | 2            | 9   | -8.46            | 0.52            | 10.23             | RANKING         |
| 2    | 3            | 3   | -7.95            | 0.45            | 10.07             | RANKING         |
| 3    | 1            | 8   | -8.18            | 0.00            | 9.37              | RANKING         |
| 4    | 1            | 6   | -7.52            | 0.00            | 10.55             | RANKING         |
| 4    | 2            | 1   | -7.18            | 0.96            | 10.54             | RANKING         |
| 5    | 1            | 10  | -7.49            | 0.00            | 10.71             | RANKING         |
| 6    | 1            | 4   | -6.48            | 0.00            | 10.54             | RANKING         |

## Compound 6

### CLUSTERING HISTOGRAM

| Cluster Rank | Lowest Docked Energy | Run | Mean Docked Energy | Number in Cluster | Histogram                |
|--------------|----------------------|-----|--------------------|-------------------|--------------------------|
|              |                      |     |                    |                   | 5 :   10 :   15 :   20 : |
| 1            | -9.25                | 7   | -9.25              | 1                 | #                        |
| 2            | -9.06                | 2   | -9.06              | 1                 | #                        |
| 3            | -8.75                | 4   | -8.68              | 2                 | ##                       |
| 4            | -8.49                | 5   | -8.49              | 1                 | #                        |
| 5            | -8.13                | 6   | -8.13              | 1                 | #                        |
| 6            | -7.94                | 1   | -7.94              | 1                 | #                        |
| 7            | -7.66                | 9   | -7.66              | 1                 | #                        |
| 8            | -7.08                | 8   | -7.08              | 1                 | #                        |
| 9            | -6.53                | 10  | -6.53              | 1                 | #                        |

Number of multi-member conformational clusters found = 1, out of 10 runs.

### RMSD TABLE

| Rank | Sub-Rank | Run | Docked Energy | Cluster RMSD | Reference RMSD | Grep Pattern |
|------|----------|-----|---------------|--------------|----------------|--------------|
| 1    | 1        | 7   | -9.25         | 0.00         | 9.60           | RANKING      |
| 2    | 1        | 2   | -9.06         | 0.00         | 9.73           | RANKING      |
| 3    | 1        | 4   | -8.75         | 0.00         | 9.79           | RANKING      |
| 3    | 2        | 3   | -8.61         | 0.94         | 9.50           | RANKING      |
| 4    | 1        | 5   | -8.49         | 0.00         | 8.72           | RANKING      |
| 5    | 1        | 6   | -8.13         | 0.00         | 10.11          | RANKING      |
| 6    | 1        | 1   | -7.94         | 0.00         | 7.95           | RANKING      |
| 7    | 1        | 9   | -7.66         | 0.00         | 9.56           | RANKING      |
| 8    | 1        | 8   | -7.08         | 0.00         | 10.62          | RANKING      |
| 9    | 1        | 10  | -6.53         | 0.00         | 8.67           | RANKING      |

## Compound 7

### CLUSTERING HISTOGRAM

| Cluster Rank | Lowest Docked Energy | Run | Mean Docked Energy | Number in Cluster | Histogram                |
|--------------|----------------------|-----|--------------------|-------------------|--------------------------|
|              |                      |     |                    |                   | 5 :   10 :   15 :   20 : |
| 1            | -8.45                | 3   | -8.17              | 3                 | ###                      |
| 2            | -8.28                | 6   | -8.28              | 1                 | #                        |
| 3            | -8.23                | 2   | -8.23              | 2                 | ##                       |
| 4            | -8.11                | 8   | -8.11              | 1                 | #                        |
| 5            | -7.62                | 1   | -7.62              | 1                 | #                        |
| 6            | -6.74                | 9   | -6.74              | 1                 | #                        |
| 7            | -6.49                | 4   | -6.49              | 1                 | #                        |

Number of multi-member conformational clusters found = 2, out of 10 runs.

### RMSD TABLE

| Rank | Sub-Rank | Run | Docked Energy | Cluster RMSD | Reference RMSD | Grep Pattern |
|------|----------|-----|---------------|--------------|----------------|--------------|
| 1    | 1        | 3   | -8.45         | 0.00         | 10.96          | RANKING      |
| 1    | 2        | 5   | -8.44         | 0.83         | 10.86          | RANKING      |
| 1    | 3        | 7   | -7.62         | 0.91         | 10.65          | RANKING      |
| 2    | 1        | 6   | -8.28         | 0.00         | 9.92           | RANKING      |
| 3    | 1        | 2   | -8.23         | 0.00         | 10.96          | RANKING      |
| 3    | 2        | 10  | -8.23         | 0.50         | 10.94          | RANKING      |
| 4    | 1        | 8   | -8.11         | 0.00         | 10.90          | RANKING      |
| 5    | 1        | 1   | -7.62         | 0.00         | 9.22           | RANKING      |
| 6    | 1        | 9   | -6.74         | 0.00         | 9.14           | RANKING      |
| 7    | 1        | 4   | -6.49         | 0.00         | 10.99          | RANKING      |

## Compound 8

### CLUSTERING HISTOGRAM

| Clus-<br>ter<br>Rank | Lowest<br>Docked<br>Energy | Run | Mean<br>Docked<br>Energy | Num<br>in<br>Clus | Histogram<br>5 10 15 20<br>: : : : |
|----------------------|----------------------------|-----|--------------------------|-------------------|------------------------------------|
| 1                    | -10.24                     | 2   | -10.24                   | 1                 | #                                  |
| 2                    | -9.89                      | 8   | -9.89                    | 1                 | #                                  |
| 3                    | -9.63                      | 9   | -9.63                    | 1                 | #                                  |
| 4                    | -9.40                      | 6   | -9.40                    | 1                 | #                                  |
| 5                    | -9.20                      | 3   | -9.20                    | 1                 | #                                  |
| 6                    | -8.64                      | 5   | -8.64                    | 1                 | #                                  |
| 7                    | -8.38                      | 4   | -8.38                    | 1                 | #                                  |
| 8                    | -7.97                      | 7   | -7.97                    | 1                 | #                                  |
| 9                    | -7.73                      | 1   | -7.73                    | 1                 | #                                  |
| 10                   | -7.38                      | 10  | -7.38                    | 1                 | #                                  |

### RMSD TABLE

| Rank | Sub-<br>Rank | Run | Docked<br>Energy | Cluster<br>RMSD | Reference<br>RMSD | Grep<br>Pattern |
|------|--------------|-----|------------------|-----------------|-------------------|-----------------|
| 1    | 1            | 2   | -10.24           | 0.00            | 7.82              | RANKING         |
| 2    | 1            | 8   | -9.89            | 0.00            | 8.85              | RANKING         |
| 3    | 1            | 9   | -9.63            | 0.00            | 9.42              | RANKING         |
| 4    | 1            | 6   | -9.40            | 0.00            | 7.50              | RANKING         |
| 5    | 1            | 3   | -9.20            | 0.00            | 9.21              | RANKING         |
| 6    | 1            | 5   | -8.64            | 0.00            | 9.40              | RANKING         |
| 7    | 1            | 4   | -8.38            | 0.00            | 8.84              | RANKING         |
| 8    | 1            | 7   | -7.97            | 0.00            | 7.74              | RANKING         |
| 9    | 1            | 1   | -7.73            | 0.00            | 7.66              | RANKING         |
| 10   | 1            | 10  | -7.38            | 0.00            | 9.62              | RANKING         |

## Compound 9

### CLUSTERING HISTOGRAM

| Clus-<br>ter<br>Rank | Lowest<br>Docked<br>Energy | Run | Mean<br>Docked<br>Energy | Num<br>in<br>Clus | Histogram<br>5 10 15 20<br>: : : : |
|----------------------|----------------------------|-----|--------------------------|-------------------|------------------------------------|
| 1                    | -10.83                     | 9   | -10.36                   | 3                 | ###                                |
| 2                    | -10.18                     | 1   | -10.18                   | 1                 | #                                  |
| 3                    | -9.25                      | 8   | -8.83                    | 2                 | ##                                 |
| 4                    | -8.95                      | 2   | -8.95                    | 1                 | #                                  |
| 5                    | -8.88                      | 3   | -8.88                    | 1                 | #                                  |
| 6                    | -8.30                      | 10  | -8.30                    | 1                 | #                                  |
| 7                    | -7.59                      | 5   | -7.59                    | 1                 | #                                  |

Number of multi-member conformational clusters found = 2, out of 10 runs.

### RMSD TABLE

| Rank | Sub-<br>Rank | Run | Docked<br>Energy | Cluster<br>RMSD | Reference<br>RMSD | Grep<br>Pattern |
|------|--------------|-----|------------------|-----------------|-------------------|-----------------|
| 1    | 1            | 9   | -10.83           | 0.00            | 9.03              | RANKING         |
| 1    | 2            | 6   | -10.25           | 0.96            | 9.07              | RANKING         |
| 1    | 3            | 4   | -10.00           | 0.88            | 9.10              | RANKING         |
| 2    | 1            | 1   | -10.18           | 0.00            | 9.51              | RANKING         |
| 3    | 1            | 8   | -9.25            | 0.00            | 6.89              | RANKING         |
| 3    | 2            | 7   | -8.41            | 0.78            | 7.13              | RANKING         |
| 4    | 1            | 2   | -8.95            | 0.00            | 8.65              | RANKING         |
| 5    | 1            | 3   | -8.88            | 0.00            | 8.71              | RANKING         |
| 6    | 1            | 10  | -8.30            | 0.00            | 8.04              | RANKING         |
| 7    | 1            | 5   | -7.59            | 0.00            | 8.90              | RANKING         |



## Compound 10

### CLUSTERING HISTOGRAM

| Clus-ter Rank | Lowest Docked Energy | Run | Mean Docked Energy | Num in Clus | Histogram |
|---------------|----------------------|-----|--------------------|-------------|-----------|
| 1             | -8.33                | 2   | -8.29              | 2           | ##        |
| 2             | -8.03                | 8   | -7.87              | 2           | ##        |
| 3             | -7.25                | 4   | -7.24              | 5           | #####     |
| 4             | -5.00                | 6   | -5.00              | 1           | #         |

Number of multi-member conformational clusters found = 3, out of 10 runs.

### RMSD TABLE

| Rank | Sub-Rank | Run | Docked Energy | Cluster RMSD | Reference RMSD | Grep Pattern |
|------|----------|-----|---------------|--------------|----------------|--------------|
| 1    | 1        | 2   | -8.33         | 0.00         | 7.25           | RANKING      |
| 1    | 2        | 9   | -8.25         | 0.19         | 7.27           | RANKING      |
| 2    | 1        | 8   | -8.03         | 0.00         | 8.08           | RANKING      |
| 2    | 2        | 1   | -7.71         | 0.27         | 8.10           | RANKING      |
| 3    | 1        | 4   | -7.25         | 0.00         | 8.36           | RANKING      |
| 3    | 2        | 5   | -7.25         | 0.26         | 8.36           | RANKING      |
| 3    | 3        | 7   | -7.24         | 0.27         | 8.36           | RANKING      |
| 3    | 4        | 10  | -7.23         | 0.30         | 8.29           | RANKING      |
| 3    | 5        | 3   | -7.22         | 0.27         | 8.36           | RANKING      |
| 4    | 1        | 6   | -5.00         | 0.00         | 7.00           | RANKING      |

## Compound 11

### CLUSTERING HISTOGRAM

| Clus-ter Rank | Lowest Docked Energy | Run | Mean Docked Energy | Num in Clus | Histogram |
|---------------|----------------------|-----|--------------------|-------------|-----------|
| 1             | -8.34                | 3   | -8.32              | 3           | ###       |
| 2             | -7.85                | 8   | -7.85              | 4           | ####      |
| 3             | -7.13                | 9   | -7.10              | 3           | ###       |

Number of multi-member conformational clusters found = 3, out of 10 runs.

### RMSD TABLE

| Rank | Sub-Rank | Run | Docked Energy | Cluster RMSD | Reference RMSD | Grep Pattern |
|------|----------|-----|---------------|--------------|----------------|--------------|
| 1    | 1        | 3   | -8.34         | 0.00         | 11.32          | RANKING      |
| 1    | 2        | 4   | -8.32         | 0.03         | 11.32          | RANKING      |
| 1    | 3        | 10  | -8.30         | 0.13         | 11.33          | RANKING      |
| 2    | 1        | 8   | -7.85         | 0.00         | 10.79          | RANKING      |
| 2    | 2        | 1   | -7.85         | 0.03         | 10.79          | RANKING      |
| 2    | 3        | 6   | -7.85         | 0.02         | 10.79          | RANKING      |
| 2    | 4        | 2   | -7.85         | 0.07         | 10.79          | RANKING      |
| 3    | 1        | 9   | -7.13         | 0.00         | 9.85           | RANKING      |
| 3    | 2        | 7   | -7.13         | 0.08         | 9.83           | RANKING      |
| 3    | 3        | 5   | -7.06         | 0.19         | 9.77           | RANKING      |

## Compound 12

### CLUSTERING HISTOGRAM

| Clus-ter Rank | Lowest Docked Energy | Run | Mean Docked Energy | Num in Clus | Histogram        |
|---------------|----------------------|-----|--------------------|-------------|------------------|
|               |                      |     |                    |             | 5 : 10 : 15 : 20 |
| 1             | -9.89                | 2   | -9.89              | 1           | #                |
| 2             | -9.46                | 7   | -8.63              | 2           | ##               |
| 3             | -8.28                | 9   | -8.28              | 1           | #                |
| 4             | -7.60                | 4   | -7.60              | 1           | #                |
| 5             | -7.17                | 5   | -7.17              | 1           | #                |
| 6             | -6.77                | 10  | -6.77              | 1           | #                |
| 7             | -6.10                | 3   | -6.10              | 1           | #                |
| 8             | -6.02                | 6   | -6.02              | 1           | #                |
| 9             | -5.37                | 1   | -5.37              | 1           | #                |

Number of multi-member conformational clusters found = 1, out of 10 runs.

### RMSD TABLE

| Rank | Sub-Rank | Run | Docked Energy | Cluster RMSD | Reference RMSD | Grep Pattern |
|------|----------|-----|---------------|--------------|----------------|--------------|
| 1    | 1        | 2   | -9.89         | 0.00         | 10.54          | RANKING      |
| 2    | 1        | 7   | -9.46         | 0.00         | 9.65           | RANKING      |
| 2    | 2        | 8   | -7.79         | 0.83         | 9.60           | RANKING      |
| 3    | 1        | 9   | -8.28         | 0.00         | 9.31           | RANKING      |
| 4    | 1        | 4   | -7.60         | 0.00         | 9.69           | RANKING      |
| 5    | 1        | 5   | -7.17         | 0.00         | 9.75           | RANKING      |
| 6    | 1        | 10  | -6.77         | 0.00         | 9.05           | RANKING      |
| 7    | 1        | 3   | -6.10         | 0.00         | 8.90           | RANKING      |
| 8    | 1        | 6   | -6.02         | 0.00         | 9.25           | RANKING      |
| 9    | 1        | 1   | -5.37         | 0.00         | 8.59           | RANKING      |

## Compound 13

### CLUSTERING HISTOGRAM

| Clus-ter Rank | Lowest Docked Energy | Run | Mean Docked Energy | Num in Clus | Histogram        |
|---------------|----------------------|-----|--------------------|-------------|------------------|
|               |                      |     |                    |             | 5 : 10 : 15 : 20 |
| 1             | -11.04               | 4   | -10.71             | 2           | ##               |
| 2             | -7.59                | 6   | -7.59              | 1           | #                |
| 3             | -7.36                | 5   | -7.36              | 1           | #                |
| 4             | -7.36                | 10  | -7.36              | 1           | #                |
| 5             | -6.76                | 3   | -6.76              | 1           | #                |
| 6             | -6.08                | 9   | -6.08              | 1           | #                |
| 7             | -5.73                | 8   | -5.73              | 1           | #                |
| 8             | -5.30                | 2   | -5.30              | 1           | #                |
| 9             | -4.79                | 1   | -4.79              | 1           | #                |

Number of multi-member conformational clusters found = 1, out of 10 runs.

### RMSD TABLE

| Rank | Sub-Rank | Run | Docked Energy | Cluster RMSD | Reference RMSD | Grep Pattern |
|------|----------|-----|---------------|--------------|----------------|--------------|
| 1    | 1        | 4   | -11.04        | 0.00         | 10.98          | RANKING      |
| 1    | 2        | 7   | -10.39        | 0.57         | 10.94          | RANKING      |
| 2    | 1        | 6   | -7.59         | 0.00         | 9.91           | RANKING      |
| 3    | 1        | 5   | -7.36         | 0.00         | 8.78           | RANKING      |
| 4    | 1        | 10  | -7.36         | 0.00         | 10.83          | RANKING      |
| 5    | 1        | 3   | -6.76         | 0.00         | 9.46           | RANKING      |
| 6    | 1        | 9   | -6.08         | 0.00         | 9.12           | RANKING      |
| 7    | 1        | 8   | -5.73         | 0.00         | 10.30          | RANKING      |
| 8    | 1        | 2   | -5.30         | 0.00         | 9.91           | RANKING      |
| 9    | 1        | 1   | -4.79         | 0.00         | 10.93          | RANKING      |

## Compound 14

### CLUSTERING HISTOGRAM

| Clus-<br>-ter<br>Rank | Lowest<br>Docked<br>Energy | Run | Mean<br>Docked<br>Energy | Num<br>in<br>Clus | Histogram             |
|-----------------------|----------------------------|-----|--------------------------|-------------------|-----------------------|
|                       |                            |     |                          |                   | 5 10 15 20<br>: : : : |
| 1                     | -8.65                      | 2   | -8.65                    | 1                 | #                     |
| 2                     | -8.50                      | 1   | -8.50                    | 1                 | #                     |
| 3                     | -8.23                      | 8   | -8.23                    | 1                 | #                     |
| 4                     | -8.14                      | 10  | -8.04                    | 2                 | ##                    |
| 5                     | -6.78                      | 5   | -6.78                    | 1                 | #                     |
| 6                     | -6.47                      | 4   | -6.47                    | 1                 | #                     |
| 7                     | -6.34                      | 9   | -6.34                    | 1                 | #                     |
| 8                     | -6.02                      | 7   | -6.02                    | 1                 | #                     |
| 9                     | -5.54                      | 3   | -5.54                    | 1                 | #                     |

Number of multi-member conformational clusters found = 1, out of 10 runs.

### RMSD TABLE

| Rank | Sub-<br>Rank | Run | Docked<br>Energy | Cluster<br>RMSD | Reference<br>RMSD | Grep<br>Pattern |
|------|--------------|-----|------------------|-----------------|-------------------|-----------------|
| 1    | 1            | 2   | -8.65            | 0.00            | 8.47              | RANKING         |
| 2    | 1            | 1   | -8.50            | 0.00            | 5.86              | RANKING         |
| 3    | 1            | 8   | -8.23            | 0.00            | 9.92              | RANKING         |
| 4    | 1            | 10  | -8.14            | 0.00            | 6.98              | RANKING         |
| 4    | 2            | 6   | -7.95            | 0.90            | 6.94              | RANKING         |
| 5    | 1            | 5   | -6.78            | 0.00            | 7.93              | RANKING         |
| 6    | 1            | 4   | -6.47            | 0.00            | 7.83              | RANKING         |
| 7    | 1            | 9   | -6.34            | 0.00            | 7.57              | RANKING         |
| 8    | 1            | 7   | -6.02            | 0.00            | 8.71              | RANKING         |
| 9    | 1            | 3   | -5.54            | 0.00            | 8.11              | RANKING         |

## Compound 15

### CLUSTERING HISTOGRAM

| Clus-<br>-ter<br>Rank | Lowest<br>Docked<br>Energy | Run | Mean<br>Docked<br>Energy | Num<br>in<br>Clus | Histogram             |
|-----------------------|----------------------------|-----|--------------------------|-------------------|-----------------------|
|                       |                            |     |                          |                   | 5 10 15 20<br>: : : : |
| 1                     | -6.51                      | 10  | -6.49                    | 3                 | ###                   |
| 2                     | -6.24                      | 4   | -6.24                    | 4                 | ####                  |
| 3                     | -5.49                      | 9   | -5.49                    | 1                 | #                     |
| 4                     | -5.45                      | 8   | -5.45                    | 2                 | ##                    |

Number of multi-member conformational clusters found = 3, out of 10 runs.

### RMSD TABLE

| Rank | Sub-<br>Rank | Run | Docked<br>Energy | Cluster<br>RMSD | Reference<br>RMSD | Grep<br>Pattern |
|------|--------------|-----|------------------|-----------------|-------------------|-----------------|
| 1    | 1            | 10  | -6.51            | 0.00            | 7.26              | RANKING         |
| 1    | 2            | 2   | -6.50            | 0.17            | 7.25              | RANKING         |
| 1    | 3            | 3   | -6.46            | 0.18            | 7.28              | RANKING         |
| 2    | 1            | 4   | -6.24            | 0.00            | 7.41              | RANKING         |
| 2    | 2            | 1   | -6.24            | 0.02            | 7.41              | RANKING         |
| 2    | 3            | 5   | -6.24            | 0.02            | 7.41              | RANKING         |
| 2    | 4            | 7   | -6.23            | 0.03            | 7.42              | RANKING         |
| 3    | 1            | 9   | -5.49            | 0.00            | 8.55              | RANKING         |
| 4    | 1            | 8   | -5.45            | 0.00            | 7.86              | RANKING         |
| 4    | 2            | 6   | -5.45            | 0.04            | 7.87              | RANKING         |

## Compound 16

### CLUSTERING HISTOGRAM

| Clus-ter Rank | Lowest Docked Energy | Run | Mean Docked Energy | Num in Clus | Histogram |
|---------------|----------------------|-----|--------------------|-------------|-----------|
| 1             | -7.26                | 1   | -7.23              | 2           | ##        |
| 2             | -6.53                | 3   | -6.53              | 2           | ##        |
| 3             | -5.82                | 8   | -5.81              | 2           | ##        |
| 4             | -5.61                | 10  | -5.61              | 1           | #         |
| 5             | -5.21                | 2   | -5.21              | 1           | #         |
| 6             | -4.97                | 5   | -4.97              | 1           | #         |
| 7             | -4.49                | 4   | -4.49              | 1           | #         |

Number of multi-member conformational clusters found = 3, out of 10 runs.

### RMSD TABLE

| Rank | Sub-Rank | Run | Docked Energy | Cluster RMSD | Reference RMSD | Grep Pattern |
|------|----------|-----|---------------|--------------|----------------|--------------|
| 1    | 1        | 1   | -7.26         | 0.00         | 7.70           | RANKING      |
| 1    | 2        | 9   | -7.20         | 0.42         | 7.57           | RANKING      |
| 2    | 1        | 3   | -6.53         | 0.00         | 7.81           | RANKING      |
| 2    | 2        | 7   | -6.53         | 0.21         | 7.83           | RANKING      |
| 3    | 1        | 8   | -5.82         | 0.00         | 8.62           | RANKING      |
| 3    | 2        | 6   | -5.81         | 0.04         | 8.64           | RANKING      |
| 4    | 1        | 10  | -5.61         | 0.00         | 7.43           | RANKING      |
| 5    | 1        | 2   | -5.21         | 0.00         | 8.21           | RANKING      |
| 6    | 1        | 5   | -4.97         | 0.00         | 8.53           | RANKING      |
| 7    | 1        | 4   | -4.49         | 0.00         | 8.44           | RANKING      |

## Compound 17

### CLUSTERING HISTOGRAM

| Clus-ter Rank | Lowest Docked Energy | Run | Mean Docked Energy | Num in Clus | Histogram |
|---------------|----------------------|-----|--------------------|-------------|-----------|
| 1             | -8.12                | 3   | -8.11              | 6           | #####     |
| 2             | -5.89                | 2   | -5.89              | 1           | #         |
| 3             | -5.86                | 5   | -5.86              | 1           | #         |
| 4             | -5.80                | 6   | -5.80              | 2           | ##        |

Number of multi-member conformational clusters found = 2, out of 10 runs.

### RMSD TABLE

| Rank | Sub-Rank | Run | Docked Energy | Cluster RMSD | Reference RMSD | Grep Pattern |
|------|----------|-----|---------------|--------------|----------------|--------------|
| 1    | 1        | 3   | -8.12         | 0.00         | 7.96           | RANKING      |
| 1    | 2        | 8   | -8.12         | 0.29         | 7.87           | RANKING      |
| 1    | 3        | 10  | -8.11         | 0.28         | 7.88           | RANKING      |
| 1    | 4        | 7   | -8.11         | 0.29         | 7.86           | RANKING      |
| 1    | 5        | 1   | -8.09         | 0.29         | 7.86           | RANKING      |
| 1    | 6        | 9   | -8.09         | 0.24         | 7.88           | RANKING      |
| 2    | 1        | 2   | -5.89         | 0.00         | 8.61           | RANKING      |
| 3    | 1        | 5   | -5.86         | 0.00         | 7.57           | RANKING      |
| 4    | 1        | 6   | -5.80         | 0.00         | 8.14           | RANKING      |
| 4    | 2        | 4   | -5.79         | 0.06         | 8.14           | RANKING      |

## Compound 18

### CLUSTERING HISTOGRAM

| Clus-<br>ter<br>Rank | Lowest<br>Docked<br>Energy | Run | Mean<br>Docked<br>Energy | Num<br>in<br>Clus | Histogram<br>5 10 15 20<br>: : : : |
|----------------------|----------------------------|-----|--------------------------|-------------------|------------------------------------|
| 1                    | -10.92                     | 6   | -10.92                   | 1                 | #                                  |
| 2                    | -9.06                      | 2   | -9.06                    | 1                 | #                                  |
| 3                    | -8.65                      | 8   | -8.65                    | 1                 | #                                  |
| 4                    | -8.03                      | 5   | -8.03                    | 1                 | #                                  |
| 5                    | -7.98                      | 3   | -7.98                    | 1                 | #                                  |
| 6                    | -7.86                      | 9   | -7.86                    | 1                 | #                                  |
| 7                    | -7.70                      | 4   | -7.70                    | 1                 | #                                  |
| 8                    | -7.50                      | 7   | -7.50                    | 1                 | #                                  |
| 9                    | -6.99                      | 10  | -6.99                    | 1                 | #                                  |
| 10                   | -6.75                      | 1   | -6.75                    | 1                 | #                                  |

### RMSD TABLE

| Rank | Sub-<br>Rank | Run | Docked<br>Energy | Cluster<br>RMSD | Reference<br>RMSD | Grep<br>Pattern |
|------|--------------|-----|------------------|-----------------|-------------------|-----------------|
| 1    | 1            | 6   | -10.92           | 0.00            | 7.85              | RANKING         |
| 2    | 1            | 2   | -9.06            | 0.00            | 9.47              | RANKING         |
| 3    | 1            | 8   | -8.65            | 0.00            | 9.40              | RANKING         |
| 4    | 1            | 5   | -8.03            | 0.00            | 7.22              | RANKING         |
| 5    | 1            | 3   | -7.98            | 0.00            | 7.37              | RANKING         |
| 6    | 1            | 9   | -7.86            | 0.00            | 9.87              | RANKING         |
| 7    | 1            | 4   | -7.70            | 0.00            | 7.42              | RANKING         |
| 8    | 1            | 7   | -7.50            | 0.00            | 10.00             | RANKING         |
| 9    | 1            | 10  | -6.99            | 0.00            | 5.53              | RANKING         |
| 10   | 1            | 1   | -6.75            | 0.00            | 8.90              | RANKING         |

## Compound 19

### CLUSTERING HISTOGRAM

| Clus-<br>ter<br>Rank | Lowest<br>Docked<br>Energy | Run | Mean<br>Docked<br>Energy | Num<br>in<br>Clus | Histogram<br>5 10 15 20<br>: : : : |
|----------------------|----------------------------|-----|--------------------------|-------------------|------------------------------------|
| 1                    | -6.77                      | 9   | -6.77                    | 1                 | #                                  |
| 2                    | -6.15                      | 6   | -6.15                    | 1                 | #                                  |
| 3                    | -6.13                      | 5   | -6.12                    | 7                 | #####                              |
| 4                    | -5.69                      | 7   | -5.69                    | 1                 | #                                  |

Number of multi-member conformational clusters found = 1, out of 10 runs.

### RMSD TABLE

| Rank | Sub-<br>Rank | Run | Docked<br>Energy | Cluster<br>RMSD | Reference<br>RMSD | Grep<br>Pattern |
|------|--------------|-----|------------------|-----------------|-------------------|-----------------|
| 1    | 1            | 9   | -6.77            | 0.00            | 8.12              | RANKING         |
| 2    | 1            | 6   | -6.15            | 0.00            | 6.10              | RANKING         |
| 3    | 1            | 5   | -6.13            | 0.00            | 8.32              | RANKING         |
| 3    | 2            | 2   | -6.13            | 0.06            | 8.31              | RANKING         |
| 3    | 3            | 4   | -6.13            | 0.05            | 8.30              | RANKING         |
| 3    | 4            | 1   | -6.13            | 0.05            | 8.30              | RANKING         |
| 3    | 5            | 8   | -6.12            | 0.03            | 8.32              | RANKING         |
| 3    | 6            | 3   | -6.12            | 0.03            | 8.34              | RANKING         |
| 3    | 7            | 10  | -6.12            | 0.04            | 8.30              | RANKING         |
| 4    | 1            | 7   | -5.69            | 0.00            | 8.23              | RANKING         |

## Compound 20

### CLUSTERING HISTOGRAM

| Cluster Rank | Lowest Docked Energy | Run | Mean Docked Energy | Num in Cluster | Histogram  |
|--------------|----------------------|-----|--------------------|----------------|------------|
|              |                      |     |                    |                | 5 10 15 20 |
|              |                      |     |                    |                | : : : :    |
| 1            | -9.60                | 7   | -9.60              | 1              | #          |
| 2            | -7.78                | 10  | -7.78              | 1              | #          |
| 3            | -7.66                | 3   | -7.66              | 1              | #          |
| 4            | -7.51                | 8   | -7.51              | 1              | #          |
| 5            | -7.32                | 5   | -7.32              | 1              | #          |
| 6            | -6.23                | 2   | -6.23              | 1              | #          |
| 7            | -5.83                | 1   | -5.83              | 1              | #          |
| 8            | -5.42                | 4   | -5.42              | 1              | #          |
| 9            | -5.27                | 6   | -5.27              | 1              | #          |
| 10           | -4.23                | 9   | -4.23              | 1              | #          |

### RMSD TABLE

| Rank | Sub-Rank | Run | Docked Energy | Cluster RMSD | Reference RMSD | Grep Pattern |
|------|----------|-----|---------------|--------------|----------------|--------------|
| 1    | 1        | 7   | -9.60         | 0.00         | 10.56          | RANKING      |
| 2    | 1        | 10  | -7.78         | 0.00         | 11.28          | RANKING      |
| 3    | 1        | 3   | -7.66         | 0.00         | 10.76          | RANKING      |
| 4    | 1        | 8   | -7.51         | 0.00         | 9.84           | RANKING      |
| 5    | 1        | 5   | -7.32         | 0.00         | 11.06          | RANKING      |
| 6    | 1        | 2   | -6.23         | 0.00         | 9.66           | RANKING      |
| 7    | 1        | 1   | -5.83         | 0.00         | 9.18           | RANKING      |
| 8    | 1        | 4   | -5.42         | 0.00         | 11.19          | RANKING      |
| 9    | 1        | 6   | -5.27         | 0.00         | 9.98           | RANKING      |
| 10   | 1        | 9   | -4.23         | 0.00         | 10.39          | RANKING      |

## Compound 21

### CLUSTERING HISTOGRAM

| Cluster Rank | Lowest Docked Energy | Run | Mean Docked Energy | Num in Cluster | Histogram  |
|--------------|----------------------|-----|--------------------|----------------|------------|
|              |                      |     |                    |                | 5 10 15 20 |
|              |                      |     |                    |                | : : : :    |
| 1            | -8.89                | 8   | -8.71              | 3              | ###        |
| 2            | -7.87                | 6   | -7.87              | 5              | #####      |
| 3            | -6.96                | 2   | -6.96              | 1              | #          |
| 4            | -6.33                | 7   | -6.33              | 1              | #          |

Number of multi-member conformational clusters found = 2, out of 10 runs.

### RMSD TABLE

| Rank | Sub-Rank | Run | Docked Energy | Cluster RMSD | Reference RMSD | Grep Pattern |
|------|----------|-----|---------------|--------------|----------------|--------------|
| 1    | 1        | 8   | -8.89         | 0.00         | 11.04          | RANKING      |
| 1    | 2        | 3   | -8.81         | 0.20         | 11.01          | RANKING      |
| 1    | 3        | 1   | -8.42         | 0.39         | 10.99          | RANKING      |
| 2    | 1        | 6   | -7.87         | 0.00         | 10.41          | RANKING      |
| 2    | 2        | 9   | -7.87         | 0.05         | 10.41          | RANKING      |
| 2    | 3        | 5   | -7.87         | 0.04         | 10.40          | RANKING      |
| 2    | 4        | 10  | -7.86         | 0.05         | 10.41          | RANKING      |
| 2    | 5        | 4   | -7.86         | 0.07         | 10.41          | RANKING      |
| 3    | 1        | 2   | -6.96         | 0.00         | 10.06          | RANKING      |
| 4    | 1        | 7   | -6.33         | 0.00         | 10.61          | RANKING      |

## Compound 22

### CLUSTERING HISTOGRAM

| Clus-ter Rank | Lowest Docked Energy | Run | Mean Docked Energy | Num in Clus | Histogram  |
|---------------|----------------------|-----|--------------------|-------------|------------|
|               |                      |     |                    |             | 5 10 15 20 |
|               |                      |     |                    |             | : : : :    |
| 1             | -6.71                | 3   | -6.70              | 5           | #####      |
| 2             | -6.25                | 10  | -6.25              | 1           | #          |
| 3             | -6.03                | 1   | -6.03              | 1           | #          |
| 4             | -4.88                | 6   | -4.88              | 1           | #          |
| 5             | -4.64                | 9   | -4.64              | 1           | #          |
| 6             | -4.55                | 5   | -4.55              | 1           | #          |

Number of multi-member conformational clusters found = 1, out of 10 runs.

### RMSD TABLE

| Rank | Sub-Rank | Run | Docked Energy | Cluster RMSD | Reference RMSD | Grep Pattern |
|------|----------|-----|---------------|--------------|----------------|--------------|
| 1    | 1        | 3   | -6.71         | 0.00         | 11.16          | RANKING      |
| 1    | 2        | 7   | -6.70         | 0.03         | 11.16          | RANKING      |
| 1    | 3        | 4   | -6.70         | 0.05         | 11.16          | RANKING      |
| 1    | 4        | 2   | -6.69         | 0.05         | 11.16          | RANKING      |
| 1    | 5        | 8   | -6.69         | 0.05         | 11.15          | RANKING      |
| 2    | 1        | 10  | -6.25         | 0.00         | 10.78          | RANKING      |
| 3    | 1        | 1   | -6.03         | 0.00         | 11.23          | RANKING      |
| 4    | 1        | 6   | -4.88         | 0.00         | 8.67           | RANKING      |
| 5    | 1        | 9   | -4.64         | 0.00         | 10.26          | RANKING      |
| 6    | 1        | 5   | -4.55         | 0.00         | 10.47          | RANKING      |

## Compound 23

### CLUSTERING HISTOGRAM

| Clus-ter Rank | Lowest Docked Energy | Run | Mean Docked Energy | Num in Clus | Histogram  |
|---------------|----------------------|-----|--------------------|-------------|------------|
|               |                      |     |                    |             | 5 10 15 20 |
|               |                      |     |                    |             | : : : :    |
| 1             | -6.96                | 2   | -6.96              | 2           | ##         |
| 2             | -6.13                | 1   | -6.12              | 5           | #####      |
| 3             | -6.01                | 10  | -6.01              | 1           | #          |
| 4             | -5.81                | 4   | -5.81              | 1           | #          |
| 5             | -5.81                | 6   | -5.81              | 1           | #          |

Number of multi-member conformational clusters found = 2, out of 10 runs.

### RMSD TABLE

| Rank | Sub-Rank | Run | Docked Energy | Cluster RMSD | Reference RMSD | Grep Pattern |
|------|----------|-----|---------------|--------------|----------------|--------------|
| 1    | 1        | 2   | -6.96         | 0.00         | 11.62          | RANKING      |
| 1    | 2        | 7   | -6.96         | 0.05         | 11.63          | RANKING      |
| 2    | 1        | 1   | -6.13         | 0.00         | 11.29          | RANKING      |
| 2    | 2        | 8   | -6.13         | 0.03         | 11.30          | RANKING      |
| 2    | 3        | 5   | -6.13         | 0.01         | 11.30          | RANKING      |
| 2    | 4        | 9   | -6.11         | 0.11         | 11.35          | RANKING      |
| 2    | 5        | 3   | -6.11         | 0.07         | 11.28          | RANKING      |
| 3    | 1        | 10  | -6.01         | 0.00         | 10.34          | RANKING      |
| 4    | 1        | 4   | -5.81         | 0.00         | 10.23          | RANKING      |
| 5    | 1        | 6   | -5.81         | 0.00         | 10.06          | RANKING      |

## Compound 24

### CLUSTERING HISTOGRAM

| Clus-<br>-ter<br>Rank | Lowest<br>Docked<br>Energy | Run | Mean<br>Docked<br>Energy | Num<br>in<br>Clus | Histogram        |
|-----------------------|----------------------------|-----|--------------------------|-------------------|------------------|
|                       |                            |     |                          |                   | 5 : 10 : 15 : 20 |
| 1                     | -10.81                     | 2   | -10.81                   | 1                 | #                |
| 2                     | -9.87                      | 1   | -8.91                    | 2                 | ##               |
| 3                     | -7.33                      | 8   | -7.33                    | 1                 | #                |
| 4                     | -7.25                      | 3   | -7.25                    | 1                 | #                |
| 5                     | -6.91                      | 9   | -6.91                    | 1                 | #                |
| 6                     | -6.88                      | 6   | -6.88                    | 1                 | #                |
| 7                     | -6.15                      | 7   | -6.15                    | 1                 | #                |
| 8                     | -5.82                      | 4   | -5.82                    | 1                 | #                |
| 9                     | -5.80                      | 10  | -5.80                    | 1                 | #                |

Number of multi-member conformational clusters found = 1, out of 10 runs.

### RMSD TABLE

| Rank | Sub-<br>Rank | Run | Docked<br>Energy | Cluster<br>RMSD | Reference<br>RMSD | Grep<br>Pattern |
|------|--------------|-----|------------------|-----------------|-------------------|-----------------|
| 1    | 1            | 2   | -10.81           | 0.00            | 5.05              | RANKING         |
| 2    | 1            | 1   | -9.87            | 0.00            | 6.12              | RANKING         |
| 2    | 2            | 5   | -7.94            | 0.99            | 6.43              | RANKING         |
| 3    | 1            | 8   | -7.33            | 0.00            | 6.55              | RANKING         |
| 4    | 1            | 3   | -7.25            | 0.00            | 8.62              | RANKING         |
| 5    | 1            | 9   | -6.91            | 0.00            | 6.08              | RANKING         |
| 6    | 1            | 6   | -6.88            | 0.00            | 5.41              | RANKING         |
| 7    | 1            | 7   | -6.15            | 0.00            | 7.88              | RANKING         |
| 8    | 1            | 4   | -5.82            | 0.00            | 7.13              | RANKING         |
| 9    | 1            | 10  | -5.80            | 0.00            | 7.39              | RANKING         |

## Compound 25

### CLUSTERING HISTOGRAM

| Clus-<br>-ter<br>Rank | Lowest<br>Docked<br>Energy | Run | Mean<br>Docked<br>Energy | Num<br>in<br>Clus | Histogram        |
|-----------------------|----------------------------|-----|--------------------------|-------------------|------------------|
|                       |                            |     |                          |                   | 5 : 10 : 15 : 20 |
| 1                     | -9.05                      | 8   | -9.05                    | 1                 | #                |
| 2                     | -7.91                      | 4   | -7.91                    | 1                 | #                |
| 3                     | -7.46                      | 7   | -7.46                    | 1                 | #                |
| 4                     | -7.28                      | 1   | -7.28                    | 1                 | #                |
| 5                     | -6.48                      | 3   | -6.48                    | 1                 | #                |
| 6                     | -6.38                      | 2   | -6.38                    | 1                 | #                |
| 7                     | -6.12                      | 5   | -6.12                    | 1                 | #                |
| 8                     | -5.58                      | 9   | -5.58                    | 1                 | #                |
| 9                     | -5.57                      | 6   | -5.57                    | 1                 | #                |
| 10                    | -3.72                      | 10  | -3.72                    | 1                 | #                |

### RMSD TABLE

| Rank | Sub-<br>Rank | Run | Docked<br>Energy | Cluster<br>RMSD | Reference<br>RMSD | Grep<br>Pattern |
|------|--------------|-----|------------------|-----------------|-------------------|-----------------|
| 1    | 1            | 8   | -9.05            | 0.00            | 8.61              | RANKING         |
| 2    | 1            | 4   | -7.91            | 0.00            | 7.64              | RANKING         |
| 3    | 1            | 7   | -7.46            | 0.00            | 8.98              | RANKING         |
| 4    | 1            | 1   | -7.28            | 0.00            | 9.95              | RANKING         |
| 5    | 1            | 3   | -6.48            | 0.00            | 8.84              | RANKING         |
| 6    | 1            | 2   | -6.38            | 0.00            | 7.66              | RANKING         |
| 7    | 1            | 5   | -6.12            | 0.00            | 8.54              | RANKING         |
| 8    | 1            | 9   | -5.58            | 0.00            | 8.03              | RANKING         |
| 9    | 1            | 6   | -5.57            | 0.00            | 7.94              | RANKING         |
| 10   | 1            | 10  | -3.72            | 0.00            | 7.23              | RANKING         |



## Compound 26

### CLUSTERING HISTOGRAM

| Clus-<br>ter<br>Rank | Lowest<br>Docked<br>Energy | Run | Mean<br>Docked<br>Energy | Num<br>in<br>Clus | Histogram<br>5 10 15 20<br>: : : : |
|----------------------|----------------------------|-----|--------------------------|-------------------|------------------------------------|
| 1                    | -9.13                      | 8   | -9.13                    | 1                 | #                                  |
| 2                    | -8.44                      | 10  | -8.44                    | 1                 | #                                  |
| 3                    | -7.86                      | 4   | -7.86                    | 1                 | #                                  |
| 4                    | -7.57                      | 5   | -7.57                    | 1                 | #                                  |
| 5                    | -6.95                      | 9   | -6.95                    | 1                 | #                                  |
| 6                    | -6.84                      | 3   | -6.84                    | 1                 | #                                  |
| 7                    | -6.71                      | 6   | -6.71                    | 1                 | #                                  |
| 8                    | -6.47                      | 7   | -6.47                    | 1                 | #                                  |
| 9                    | -6.37                      | 1   | -6.37                    | 1                 | #                                  |
| 10                   | -5.36                      | 2   | -5.36                    | 1                 | #                                  |

### RMSD TABLE

| Rank | Sub-<br>Rank | Run | Docked<br>Energy | Cluster<br>RMSD | Reference<br>RMSD | Grep<br>Pattern |
|------|--------------|-----|------------------|-----------------|-------------------|-----------------|
| 1    | 1            | 8   | -9.13            | 0.00            | 10.34             | RANKING         |
| 2    | 1            | 10  | -8.44            | 0.00            | 8.55              | RANKING         |
| 3    | 1            | 4   | -7.86            | 0.00            | 9.10              | RANKING         |
| 4    | 1            | 5   | -7.57            | 0.00            | 8.33              | RANKING         |
| 5    | 1            | 9   | -6.95            | 0.00            | 8.87              | RANKING         |
| 6    | 1            | 3   | -6.84            | 0.00            | 7.92              | RANKING         |
| 7    | 1            | 6   | -6.71            | 0.00            | 6.87              | RANKING         |
| 8    | 1            | 7   | -6.47            | 0.00            | 9.04              | RANKING         |
| 9    | 1            | 1   | -6.37            | 0.00            | 7.02              | RANKING         |
| 10   | 1            | 2   | -5.36            | 0.00            | 9.29              | RANKING         |

## Compound 27

### CLUSTERING HISTOGRAM

| Clus-<br>ter<br>Rank | Lowest<br>Docked<br>Energy | Run | Mean<br>Docked<br>Energy | Num<br>in<br>Clus | Histogram<br>5 10 15 20<br>: : : : |
|----------------------|----------------------------|-----|--------------------------|-------------------|------------------------------------|
| 1                    | -8.30                      | 2   | -8.13                    | 6                 | #####                              |
| 2                    | -5.93                      | 7   | -5.93                    | 1                 | #                                  |
| 3                    | -5.72                      | 5   | -5.72                    | 1                 | #                                  |
| 4                    | -5.38                      | 8   | -5.37                    | 2                 | ##                                 |

Number of multi-member conformational clusters found = 2, out of 10 runs.

### RMSD TABLE

| Rank | Sub-<br>Rank | Run | Docked<br>Energy | Cluster<br>RMSD | Reference<br>RMSD | Grep<br>Pattern |
|------|--------------|-----|------------------|-----------------|-------------------|-----------------|
| 1    | 1            | 2   | -8.30            | 0.00            | 11.28             | RANKING         |
| 1    | 2            | 1   | -8.30            | 0.05            | 11.27             | RANKING         |
| 1    | 3            | 9   | -8.30            | 0.05            | 11.28             | RANKING         |
| 1    | 4            | 3   | -8.30            | 0.06            | 11.26             | RANKING         |
| 1    | 5            | 6   | -8.20            | 0.13            | 11.31             | RANKING         |
| 1    | 6            | 10  | -7.39            | 0.56            | 11.06             | RANKING         |
| 2    | 1            | 7   | -5.93            | 0.00            | 10.67             | RANKING         |
| 3    | 1            | 5   | -5.72            | 0.00            | 10.17             | RANKING         |
| 4    | 1            | 8   | -5.38            | 0.00            | 10.19             | RANKING         |
| 4    | 2            | 4   | -5.36            | 0.03            | 10.20             | RANKING         |

## Compound 28

### CLUSTERING HISTOGRAM

| Clus-<br>ter<br>Rank | Lowest<br>Docked<br>Energy | Run | Mean<br>Docked<br>Energy | Num<br>in<br>Clus | Histogram |    |    |    |  |
|----------------------|----------------------------|-----|--------------------------|-------------------|-----------|----|----|----|--|
|                      |                            |     |                          |                   | 5         | 10 | 15 | 20 |  |
| 1                    | -9.02                      | 8   | -9.02                    | 1                 | #         |    |    |    |  |
| 2                    | -7.91                      | 2   | -7.91                    | 1                 | #         |    |    |    |  |
| 3                    | -7.12                      | 7   | -7.12                    | 1                 | #         |    |    |    |  |
| 4                    | -5.83                      | 1   | -5.83                    | 1                 | #         |    |    |    |  |
| 5                    | -4.71                      | 4   | -4.71                    | 1                 | #         |    |    |    |  |
| 6                    | -4.70                      | 5   | -4.70                    | 1                 | #         |    |    |    |  |
| 7                    | -3.02                      | 6   | -3.02                    | 1                 | #         |    |    |    |  |
| 8                    | -2.77                      | 9   | -2.77                    | 1                 | #         |    |    |    |  |
| 9                    | -2.63                      | 3   | -2.63                    | 1                 | #         |    |    |    |  |
| 10                   | -1.18                      | 10  | -1.18                    | 1                 | #         |    |    |    |  |

### RMSD TABLE

| Rank | Sub-<br>Rank | Run | Docked<br>Energy | Cluster<br>RMSD | Reference<br>RMSD | Grep<br>Pattern |
|------|--------------|-----|------------------|-----------------|-------------------|-----------------|
| 1    | 1            | 8   | -9.02            | 0.00            | 10.05             | RANKING         |
| 2    | 1            | 2   | -7.91            | 0.00            | 7.83              | RANKING         |
| 3    | 1            | 7   | -7.12            | 0.00            | 9.78              | RANKING         |
| 4    | 1            | 1   | -5.83            | 0.00            | 6.90              | RANKING         |
| 5    | 1            | 4   | -4.71            | 0.00            | 6.33              | RANKING         |
| 6    | 1            | 5   | -4.70            | 0.00            | 9.71              | RANKING         |
| 7    | 1            | 6   | -3.02            | 0.00            | 7.48              | RANKING         |
| 8    | 1            | 9   | -2.77            | 0.00            | 7.68              | RANKING         |
| 9    | 1            | 3   | -2.63            | 0.00            | 6.14              | RANKING         |
| 10   | 1            | 10  | -1.18            | 0.00            | 6.29              | RANKING         |

## Compound 29

### CLUSTERING HISTOGRAM

| Clus-<br>ter<br>Rank | Lowest<br>Docked<br>Energy | Run | Mean<br>Docked<br>Energy | Num<br>in<br>Clus | Histogram |    |    |    |  |
|----------------------|----------------------------|-----|--------------------------|-------------------|-----------|----|----|----|--|
|                      |                            |     |                          |                   | 5         | 10 | 15 | 20 |  |
| 1                    | -7.54                      | 6   | -7.54                    | 1                 | #         |    |    |    |  |
| 2                    | -6.28                      | 3   | -6.28                    | 1                 | #         |    |    |    |  |
| 3                    | -5.61                      | 1   | -5.61                    | 1                 | #         |    |    |    |  |
| 4                    | -4.67                      | 4   | -4.67                    | 1                 | #         |    |    |    |  |
| 5                    | -4.01                      | 8   | -4.01                    | 1                 | #         |    |    |    |  |
| 6                    | -3.64                      | 10  | -3.64                    | 1                 | #         |    |    |    |  |
| 7                    | -3.60                      | 2   | -3.60                    | 1                 | #         |    |    |    |  |
| 8                    | -2.33                      | 5   | -2.33                    | 1                 | #         |    |    |    |  |
| 9                    | -0.66                      | 7   | -0.66                    | 1                 | #         |    |    |    |  |
| 10                   | -0.62                      | 9   | -0.62                    | 1                 | #         |    |    |    |  |

### RMSD TABLE

| Rank | Sub-<br>Rank | Run | Docked<br>Energy | Cluster<br>RMSD | Reference<br>RMSD | Grep<br>Pattern |
|------|--------------|-----|------------------|-----------------|-------------------|-----------------|
| 1    | 1            | 6   | -7.54            | 0.00            | 10.17             | RANKING         |
| 2    | 1            | 3   | -6.28            | 0.00            | 9.91              | RANKING         |
| 3    | 1            | 1   | -5.61            | 0.00            | 9.93              | RANKING         |
| 4    | 1            | 4   | -4.67            | 0.00            | 9.42              | RANKING         |
| 5    | 1            | 8   | -4.01            | 0.00            | 9.51              | RANKING         |
| 6    | 1            | 10  | -3.64            | 0.00            | 8.72              | RANKING         |
| 7    | 1            | 2   | -3.60            | 0.00            | 8.24              | RANKING         |
| 8    | 1            | 5   | -2.33            | 0.00            | 7.34              | RANKING         |
| 9    | 1            | 7   | -0.66            | 0.00            | 7.59              | RANKING         |
| 10   | 1            | 9   | -0.62            | 0.00            | 8.54              | RANKING         |

### Compound 30

#### CLUSTERING HISTOGRAM

| Cluster Rank | Lowest Docked Energy | Run | Mean Docked Energy | Num in Cluster | Histogram |    |    |    |  |
|--------------|----------------------|-----|--------------------|----------------|-----------|----|----|----|--|
|              |                      |     |                    |                | 5         | 10 | 15 | 20 |  |
| 1            | -5.77                | 1   | -5.77              | 1              | #         |    |    |    |  |
| 2            | -5.72                | 9   | -5.72              | 1              | #         |    |    |    |  |
| 3            | -5.54                | 2   | -5.54              | 1              | #         |    |    |    |  |
| 4            | -5.39                | 10  | -5.39              | 1              | #         |    |    |    |  |
| 5            | -5.28                | 6   | -5.28              | 1              | #         |    |    |    |  |
| 6            | -4.50                | 5   | -4.50              | 1              | #         |    |    |    |  |
| 7            | -3.75                | 8   | -3.75              | 1              | #         |    |    |    |  |
| 8            | -2.83                | 4   | -2.83              | 1              | #         |    |    |    |  |
| 9            | -2.67                | 3   | -2.67              | 1              | #         |    |    |    |  |
| 10           | -1.83                | 7   | -1.83              | 1              | #         |    |    |    |  |

#### RMSD TABLE

| Rank | Sub-Rank | Run | Docked Energy | Cluster RMSD | Reference RMSD | Grep Pattern |
|------|----------|-----|---------------|--------------|----------------|--------------|
| 1    | 1        | 1   | -5.77         | 0.00         | 6.44           | RANKING      |
| 2    | 1        | 9   | -5.72         | 0.00         | 6.82           | RANKING      |
| 3    | 1        | 2   | -5.54         | 0.00         | 6.15           | RANKING      |
| 4    | 1        | 10  | -5.39         | 0.00         | 7.77           | RANKING      |
| 5    | 1        | 6   | -5.28         | 0.00         | 6.78           | RANKING      |
| 6    | 1        | 5   | -4.50         | 0.00         | 8.84           | RANKING      |
| 7    | 1        | 8   | -3.75         | 0.00         | 5.87           | RANKING      |
| 8    | 1        | 4   | -2.83         | 0.00         | 7.15           | RANKING      |
| 9    | 1        | 3   | -2.67         | 0.00         | 6.17           | RANKING      |
| 10   | 1        | 7   | -1.83         | 0.00         | 6.13           | RANKING      |

### Compound 31

#### CLUSTERING HISTOGRAM

| Cluster Rank | Lowest Docked Energy | Run | Mean Docked Energy | Num in Cluster | Histogram |    |    |    |  |
|--------------|----------------------|-----|--------------------|----------------|-----------|----|----|----|--|
|              |                      |     |                    |                | 5         | 10 | 15 | 20 |  |
| 1            | -9.76                | 2   | -9.76              | 1              | #         |    |    |    |  |
| 2            | -6.39                | 8   | -6.39              | 1              | #         |    |    |    |  |
| 3            | -4.94                | 5   | -4.94              | 1              | #         |    |    |    |  |
| 4            | -4.08                | 4   | -4.08              | 1              | #         |    |    |    |  |
| 5            | -3.61                | 10  | -3.61              | 1              | #         |    |    |    |  |
| 6            | -3.57                | 6   | -3.57              | 1              | #         |    |    |    |  |
| 7            | -3.51                | 7   | -3.51              | 1              | #         |    |    |    |  |
| 8            | -2.99                | 1   | -2.99              | 1              | #         |    |    |    |  |
| 9            | -2.19                | 9   | -2.19              | 1              | #         |    |    |    |  |
| 10           | -0.02                | 3   | -0.02              | 1              | #         |    |    |    |  |

#### RMSD TABLE

| Rank | Sub-Rank | Run | Docked Energy | Cluster RMSD | Reference RMSD | Grep Pattern |
|------|----------|-----|---------------|--------------|----------------|--------------|
| 1    | 1        | 2   | -9.76         | 0.00         | 8.49           | RANKING      |
| 2    | 1        | 8   | -6.39         | 0.00         | 6.49           | RANKING      |
| 3    | 1        | 5   | -4.94         | 0.00         | 7.70           | RANKING      |
| 4    | 1        | 4   | -4.08         | 0.00         | 8.78           | RANKING      |
| 5    | 1        | 10  | -3.61         | 0.00         | 7.20           | RANKING      |
| 6    | 1        | 6   | -3.57         | 0.00         | 7.56           | RANKING      |
| 7    | 1        | 7   | -3.51         | 0.00         | 5.96           | RANKING      |
| 8    | 1        | 1   | -2.99         | 0.00         | 7.64           | RANKING      |
| 9    | 1        | 9   | -2.19         | 0.00         | 8.54           | RANKING      |
| 10   | 1        | 3   | -0.02         | 0.00         | 7.76           | RANKING      |

## Compound 32

### CLUSTERING HISTOGRAM

| Clus-<br>ter<br>Rank | Lowest<br>Docked<br>Energy | Run | Mean<br>Docked<br>Energy | Num<br>in<br>Clus | Histogram |    |    |    |  |
|----------------------|----------------------------|-----|--------------------------|-------------------|-----------|----|----|----|--|
|                      |                            |     |                          |                   | 5         | 10 | 15 | 20 |  |
| 1                    | -9.30                      | 8   | -9.30                    | 1                 | #         |    |    |    |  |
| 2                    | -5.94                      | 10  | -5.94                    | 1                 | #         |    |    |    |  |
| 3                    | -5.24                      | 3   | -5.24                    | 1                 | #         |    |    |    |  |
| 4                    | -4.86                      | 4   | -4.86                    | 1                 | #         |    |    |    |  |
| 5                    | -4.37                      | 1   | -4.37                    | 1                 | #         |    |    |    |  |
| 6                    | -4.25                      | 7   | -4.25                    | 1                 | #         |    |    |    |  |
| 7                    | -3.62                      | 6   | -3.62                    | 1                 | #         |    |    |    |  |
| 8                    | -2.34                      | 9   | -2.34                    | 1                 | #         |    |    |    |  |
| 9                    | -2.31                      | 2   | -2.31                    | 1                 | #         |    |    |    |  |
| 10                   | -1.70                      | 5   | -1.70                    | 1                 | #         |    |    |    |  |

### RMSD TABLE

| Rank | Sub-<br>Rank | Run | Docked<br>Energy | Cluster<br>RMSD | Reference<br>RMSD | Grep<br>Pattern |
|------|--------------|-----|------------------|-----------------|-------------------|-----------------|
| 1    | 1            | 8   | -9.30            | 0.00            | 8.71              | RANKING         |
| 2    | 1            | 10  | -5.94            | 0.00            | 7.08              | RANKING         |
| 3    | 1            | 3   | -5.24            | 0.00            | 9.57              | RANKING         |
| 4    | 1            | 4   | -4.86            | 0.00            | 6.93              | RANKING         |
| 5    | 1            | 1   | -4.37            | 0.00            | 8.45              | RANKING         |
| 6    | 1            | 7   | -4.25            | 0.00            | 8.55              | RANKING         |
| 7    | 1            | 6   | -3.62            | 0.00            | 7.30              | RANKING         |
| 8    | 1            | 9   | -2.34            | 0.00            | 7.63              | RANKING         |
| 9    | 1            | 2   | -2.31            | 0.00            | 8.17              | RANKING         |
| 10   | 1            | 5   | -1.70            | 0.00            | 6.54              | RANKING         |

## GRID Calculations

A picture of the PKA catalytic subunit active site is shown, including an ATP molecule as well as favourable energy phosphate regions, calculated using GRID program. The most favourable position has an interaction energy of -19.8305 kcal/mol.

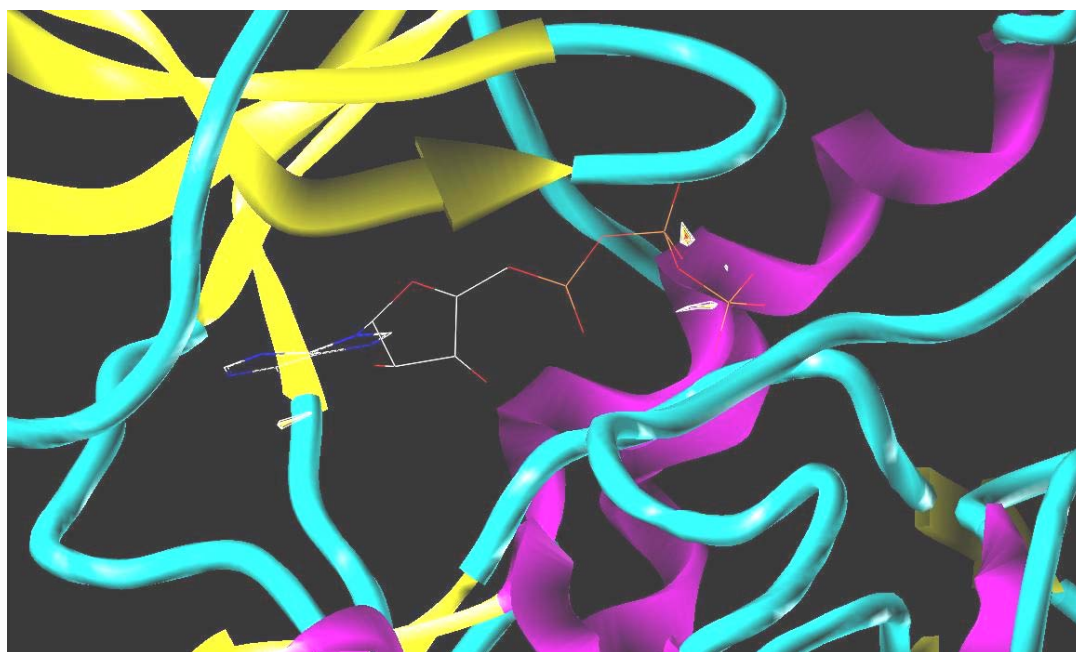

## NMR spectra

$^1\text{H}$ -NMR and HSQC spectra of pseudodisaccharides **8**, **9** and **34** at pH = 5.6, 6.3 and 5.5 respectively and pseudotrisaccharides **10**, **13**, **17**, **35** and **36** at pH = 6.8, 5.8, 6.5, 5.8 and 5.9 respectively, acquired on a Bruker DRX-500 spectrometer in deuterium oxide are shown:

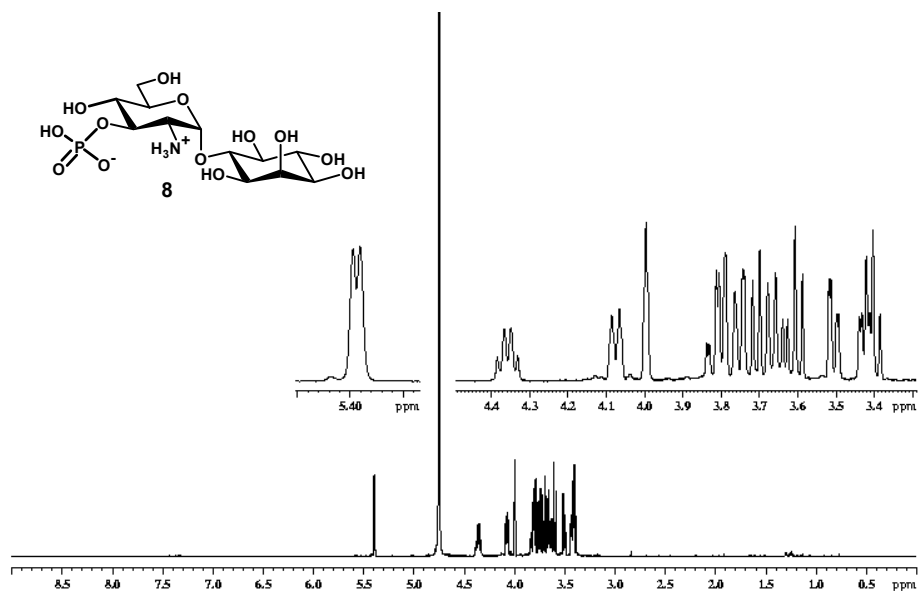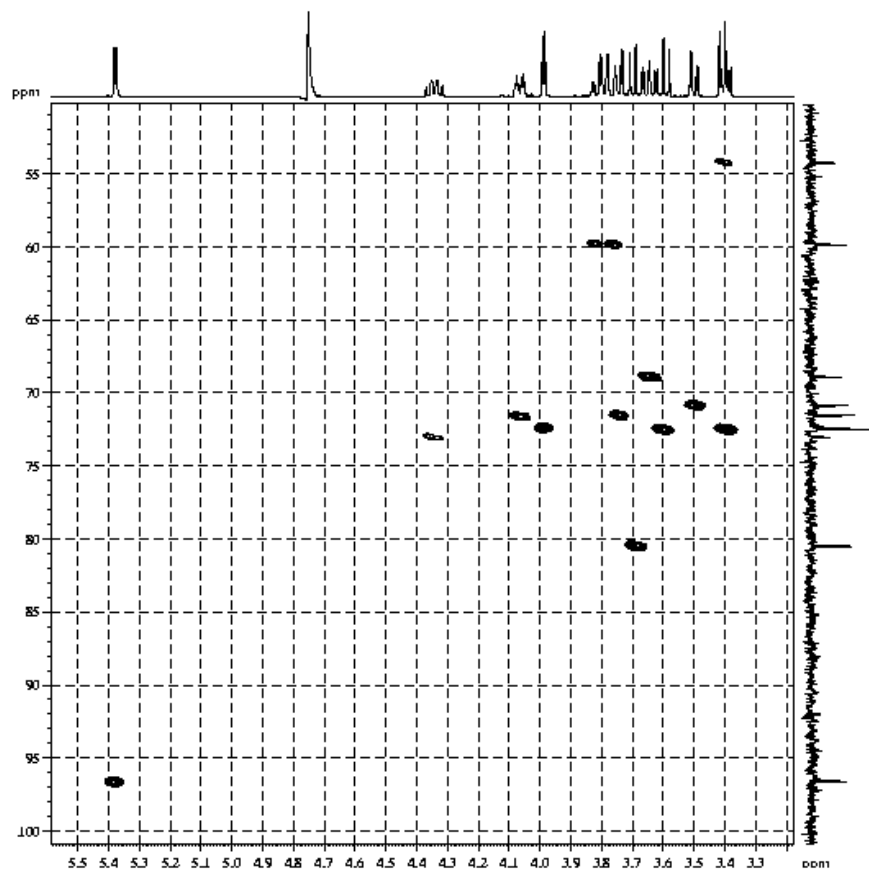

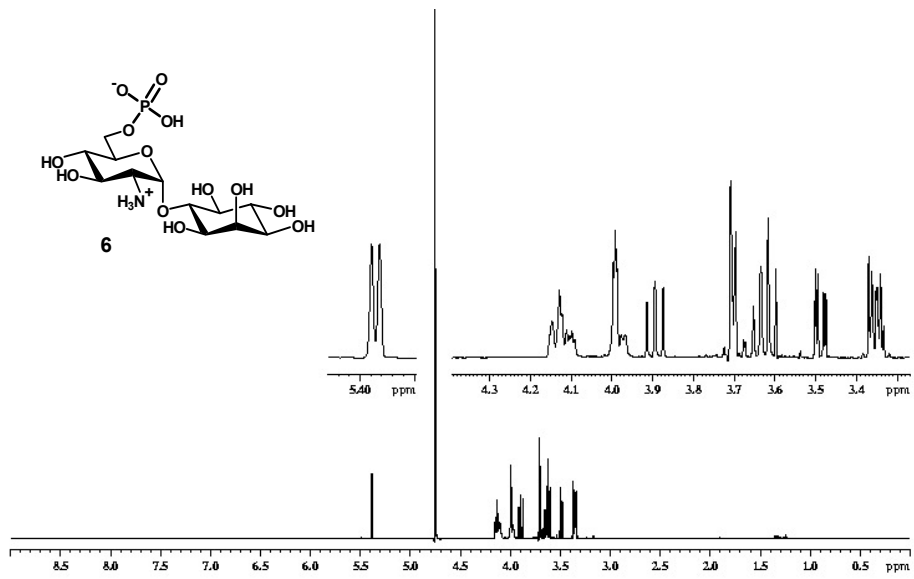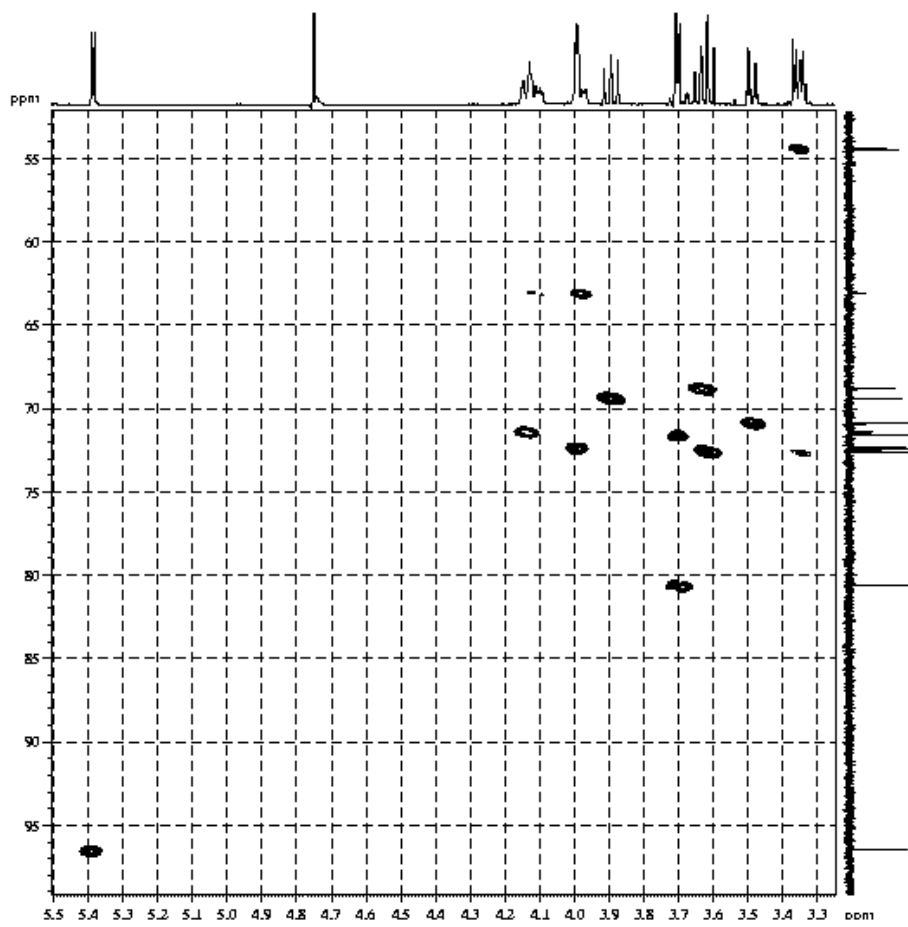

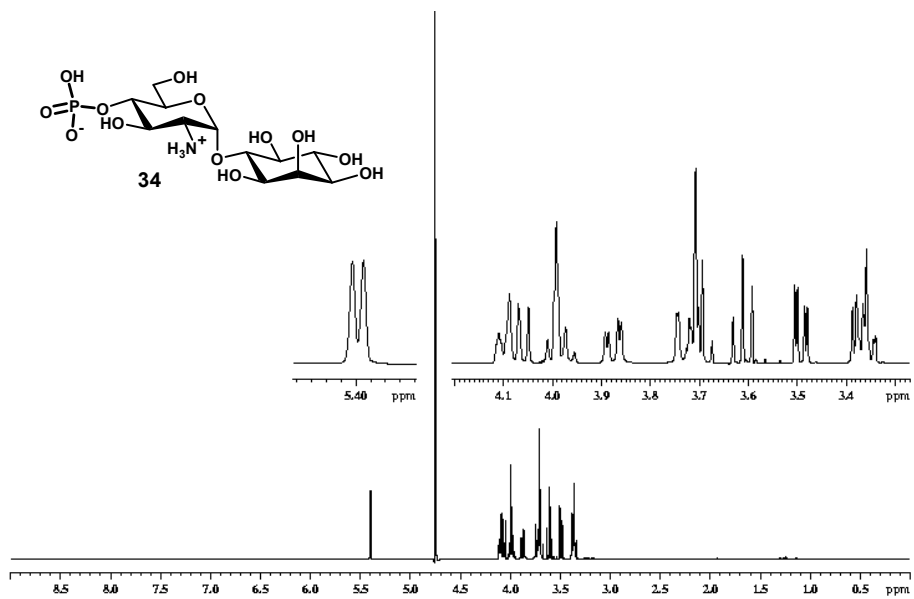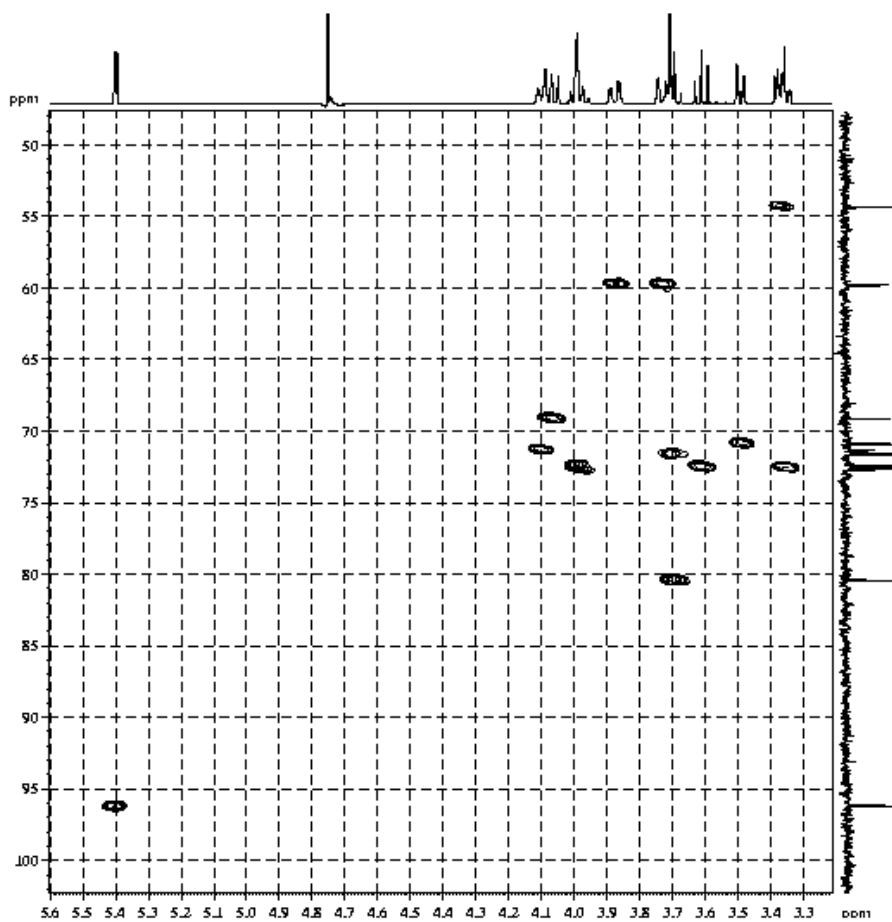

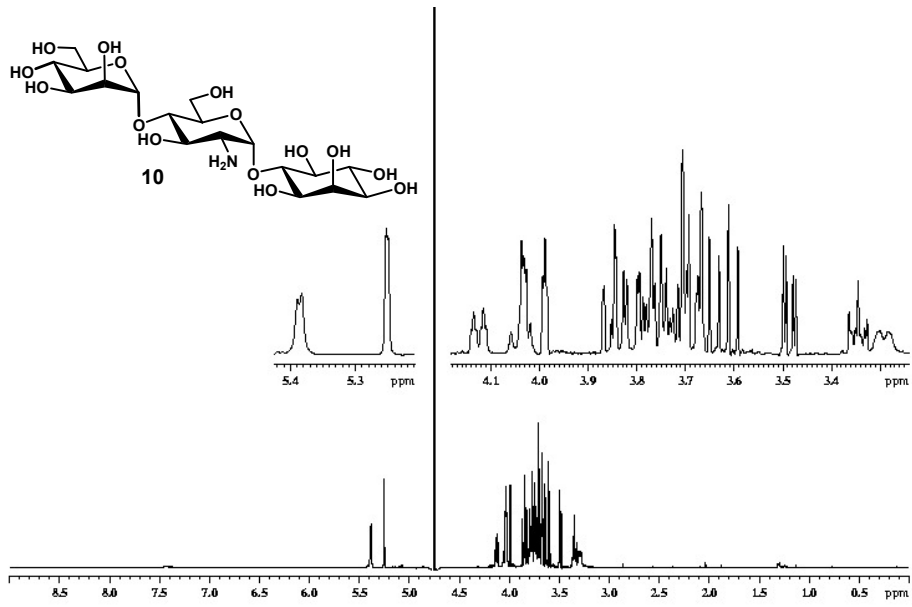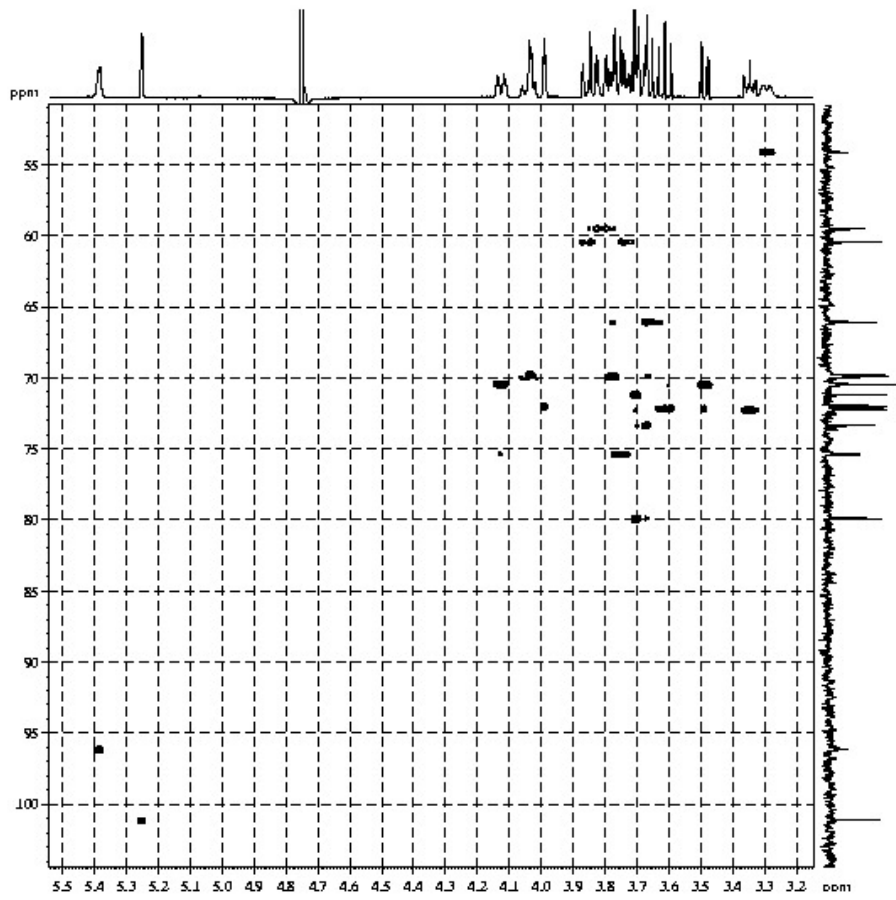



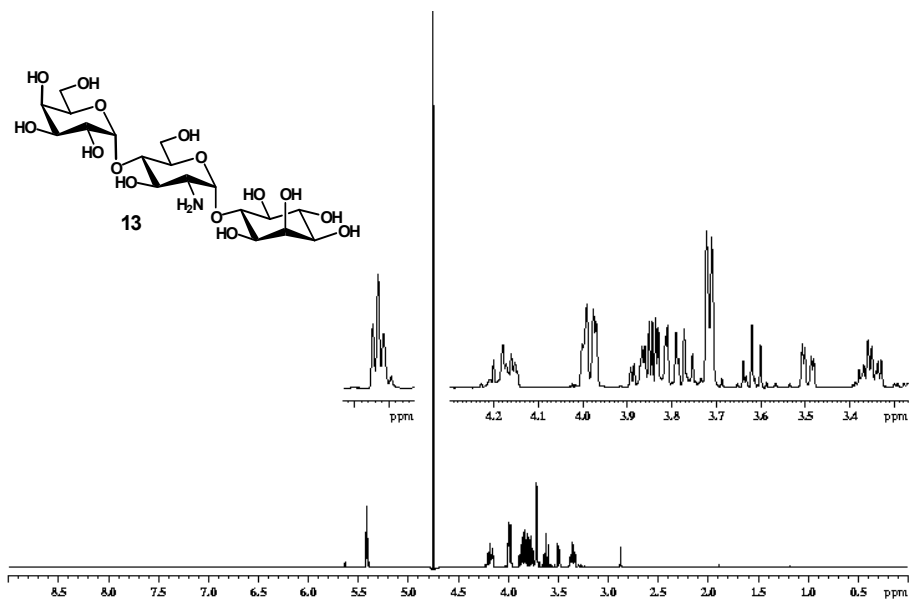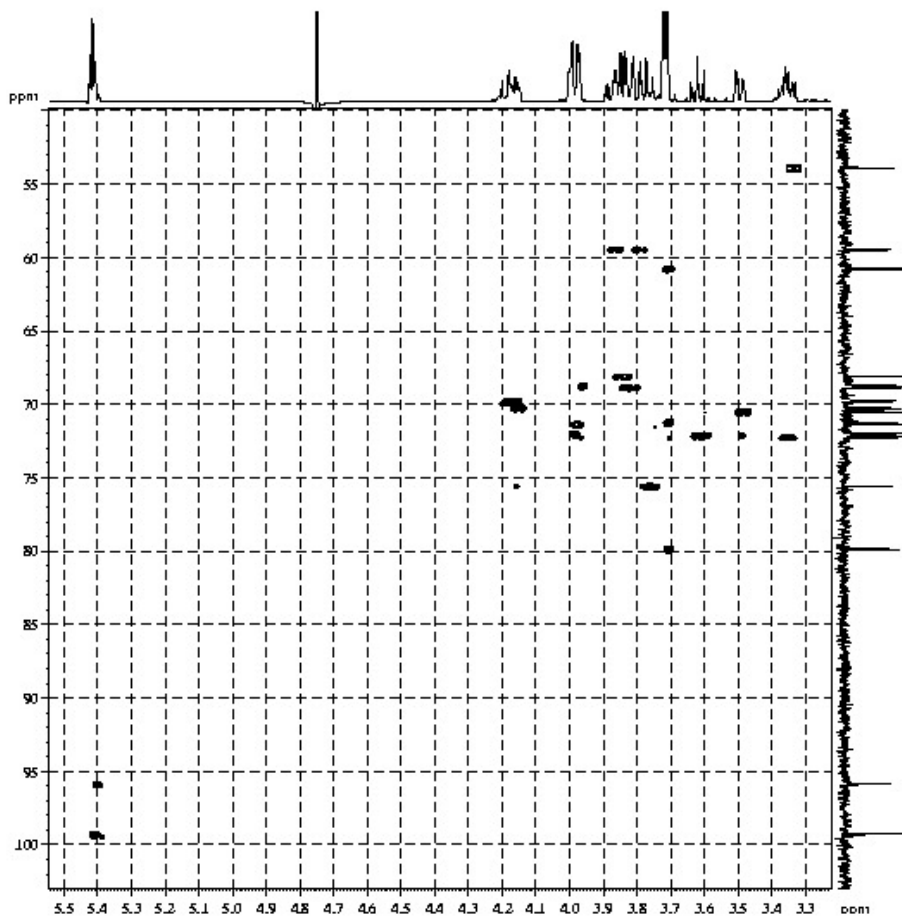

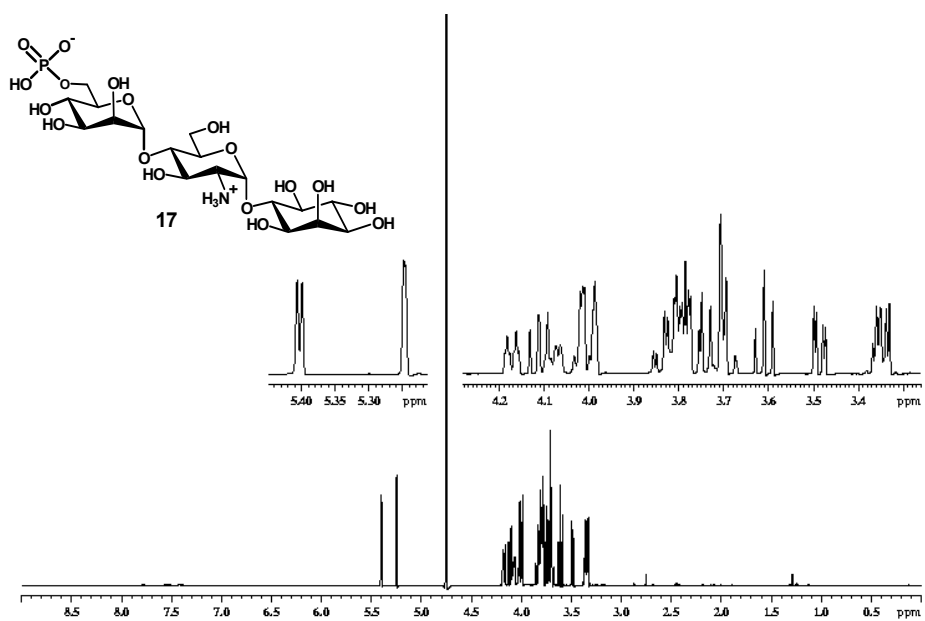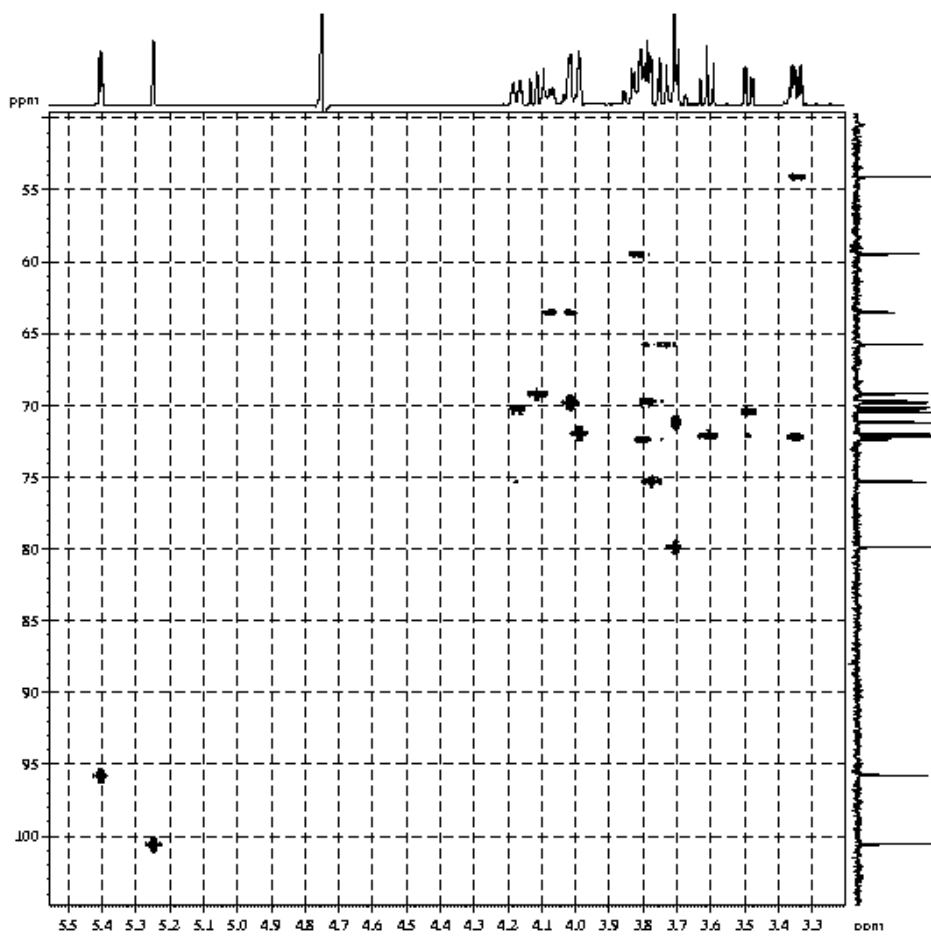

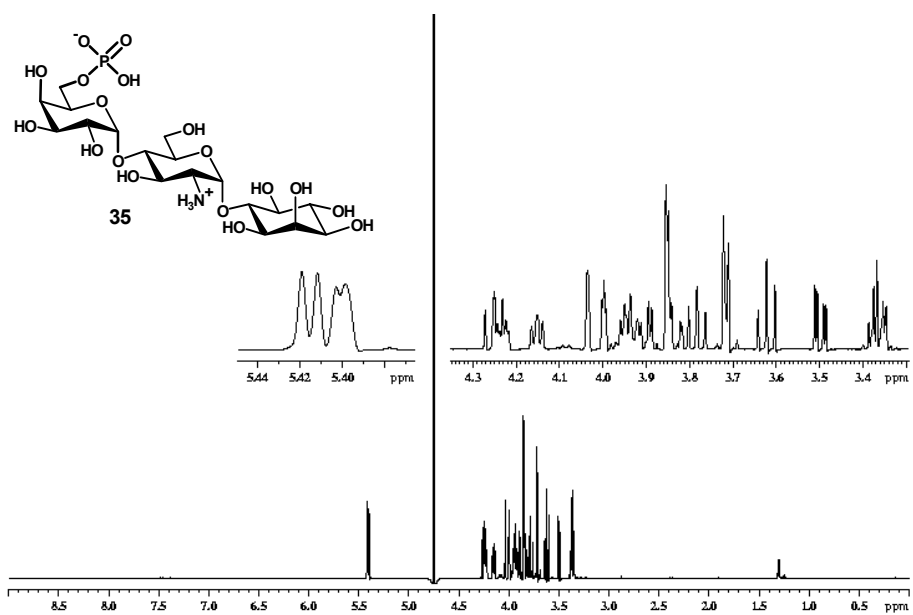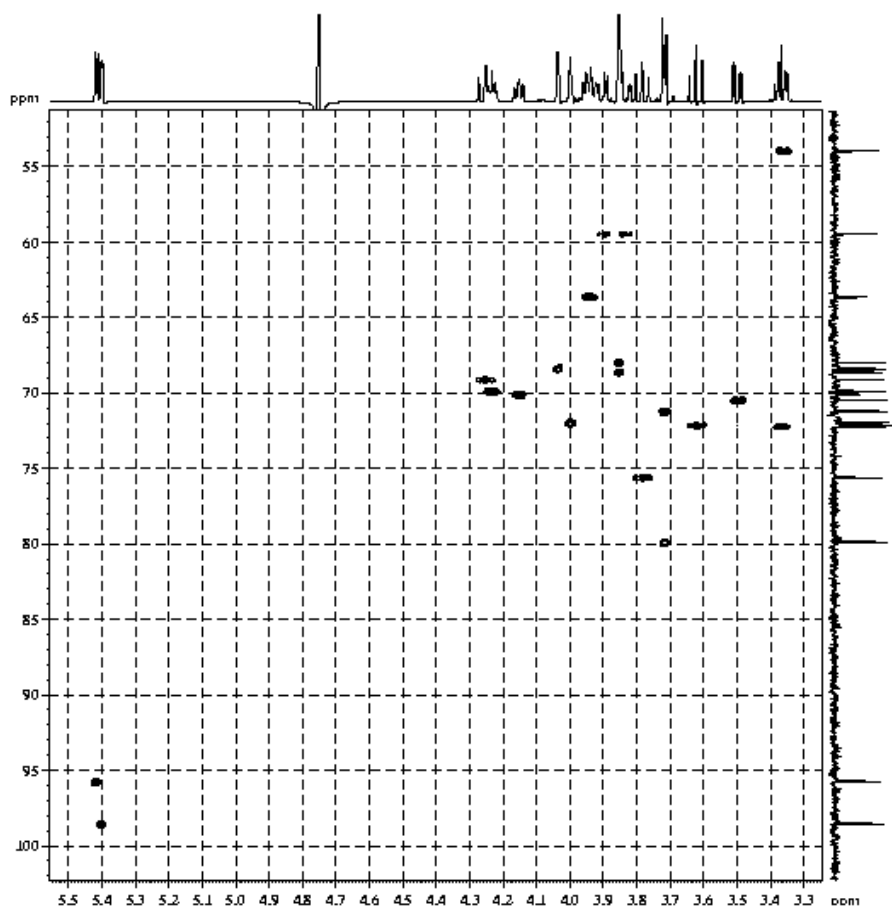

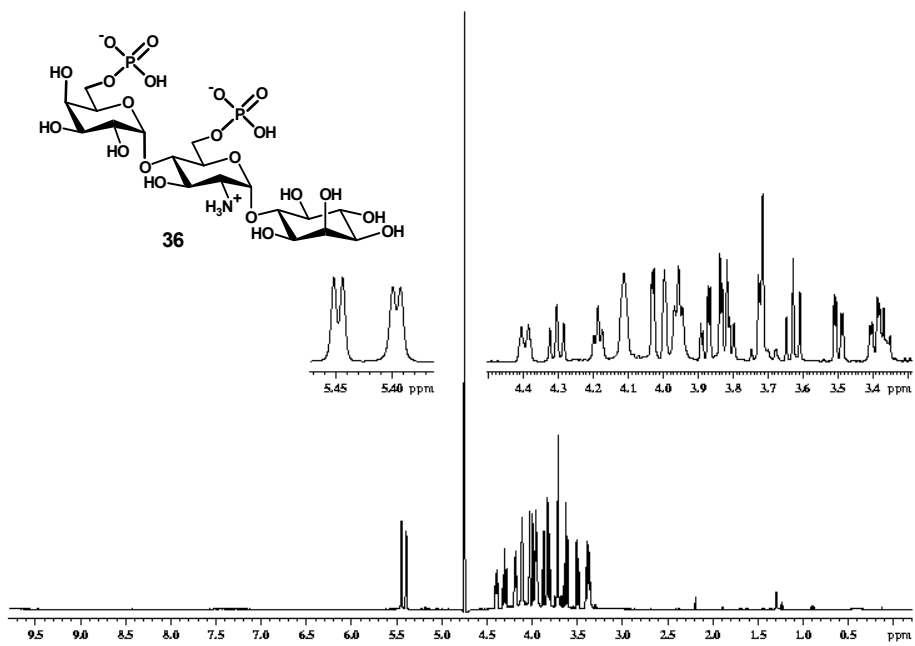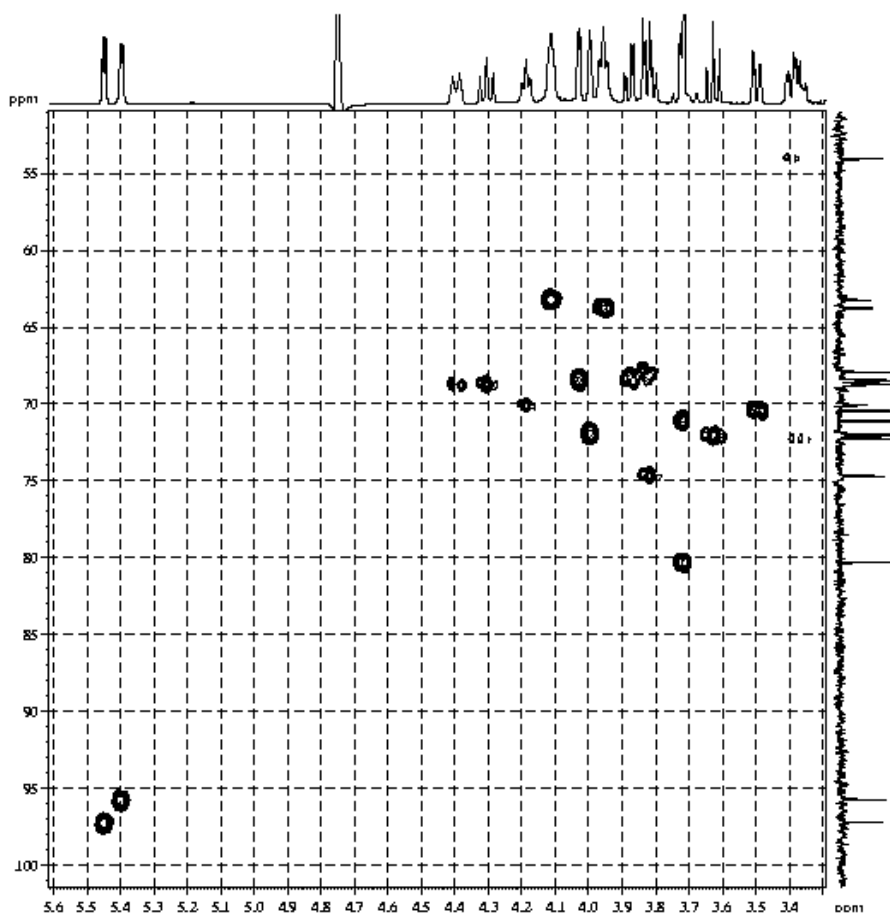

Supplement: b418041k.pdf [file b418041k.pdf]
